# Supplementary material for: Design, synthesis, and evaluation of novel ferrostatin derivatives for the prevention of HG-induced VEC ferroptosis
Source: Royal Society of Chemistry journal article supplement (doi:10.1039/d4md00038b), 2024-01-01

**Design, synthesis, and evaluation of novel ferrostatin derivatives for the prevention of HG-induced VEC ferroptosis**

Xin-Xin Wang<sup>a,†</sup>, Run-Jie Wang<sup>b,†</sup>, Hua-Long Ji<sup>a,†</sup>, Xiao-Yu Liu<sup>c</sup>, Nai-Yu Zhang<sup>a</sup>, Kai-Ming Wang<sup>a</sup>, Kai Chen<sup>c,\*</sup>, Ping-Ping Liu<sup>d,\*</sup>, Ning Meng<sup>a,\*</sup>, Cheng-Shi Jiang<sup>a,\*</sup>

*<sup>a</sup> School of Biological Science and Technology, University of Jinan, Jinan 250022, China*

*<sup>b</sup> Key Laboratory of Forest Plant Ecology, Ministry of Education, College of Chemistry, Chemical Engineering and Resource Utilization, Northeast Forestry University, Harbin 150040, China*

*<sup>c</sup> Evaluation Center of the New Drug, Shandong Academy of Pharmaceutical Sciences, Jinan 250101, China*

*<sup>d</sup> Department of Gynaecology and Obstetrics, 960<sup>th</sup> Hospital of PLA, Jinan 250000, China*

\*Corresponding authors

E-mail addresses: chen kai@sdaps.cn (K. Chen); 13065010512@163.com (P.-P. Liu); mls\_mengn@ujn.edu.cn (N. Meng); bio\_jiangcs@ujn.edu.cn (C.-S. Jiang)

<sup>†</sup> These authors contribute equally.

**Figure 1.**  $^1\text{H}$  NMR spectrum of **2**

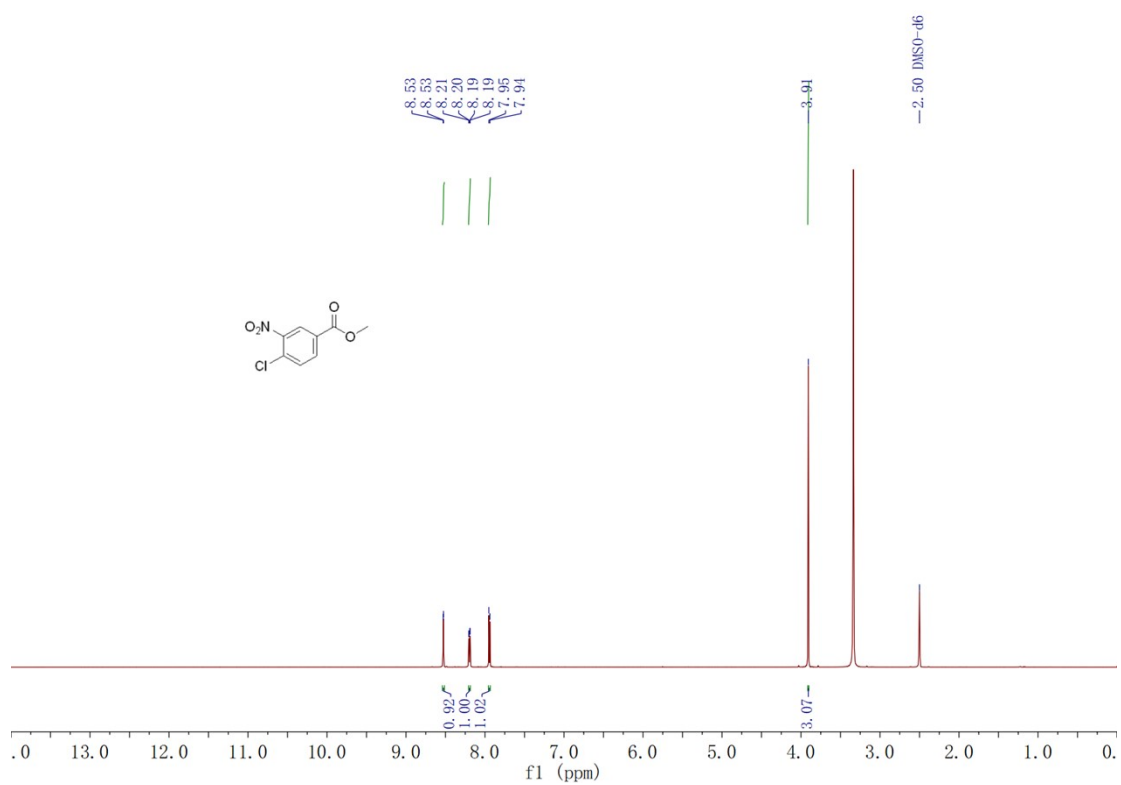

**Figure 2.**  $^{13}\text{C}$  NMR spectrum of **2**

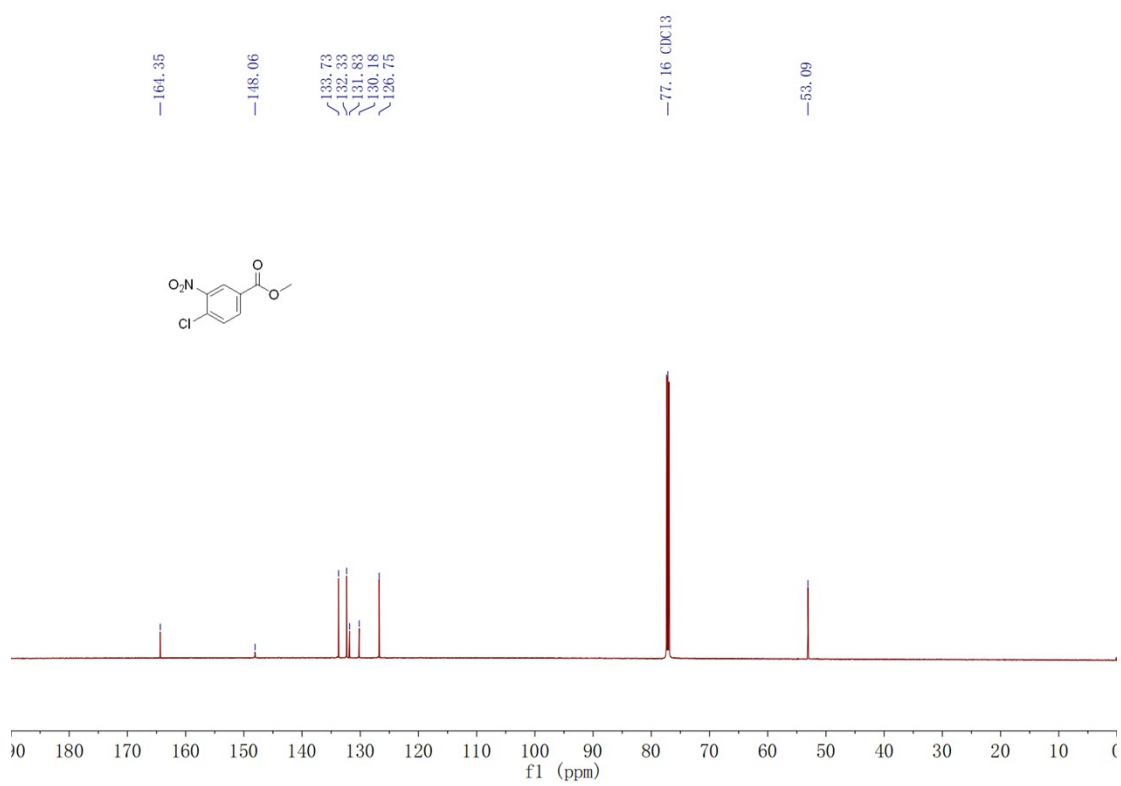

Chemical structure: COC(=O)c1cc([N+](=O)[O-])cc(NC2CCCCC2)c1

<sup>1</sup>H NMR spectrum (DMSO-d<sub>6</sub>) showing peaks and integrations:

| Chemical Shift (ppm) | Integration |
|----------------------|-------------|
| 8.61                 | 0.85        |
| 8.61                 | 1.00        |
| 8.28                 | 1.03        |
| 7.96                 |             |
| 7.95                 |             |
| 7.94                 |             |
| 7.94                 |             |
| 7.94                 |             |
| 7.21                 |             |
| 7.20                 |             |
| 3.82                 |             |
| 2.50                 |             |
| 1.97                 |             |
| 1.96                 |             |
| 1.95                 |             |
| 1.94                 |             |
| 1.94                 |             |
| 1.72                 |             |
| 1.71                 |             |
| 1.71                 |             |
| 1.70                 |             |
| 1.69                 |             |
| 1.61                 |             |
| 1.61                 |             |
| 1.60                 |             |
| 1.59                 |             |
| 1.58                 |             |
| 1.58                 |             |
| 1.46                 |             |
| 1.45                 |             |
| 1.44                 |             |
| 1.43                 |             |
| 1.43                 |             |
| 1.42                 |             |
| 1.42                 |             |
| 1.41                 |             |
| 1.41                 |             |
| 1.40                 |             |
| 1.39                 |             |
| 1.39                 |             |
| 1.37                 |             |
| 1.37                 |             |
| 1.27                 |             |
| 1.27                 |             |
| 1.26                 |             |
| 1.25                 |             |
| 1.25                 |             |
| 1.25                 |             |
| 1.24                 |             |
| 1.23                 |             |
| 1.23                 |             |
| 1.22                 |             |
| 1.21                 |             |

Integration values (from left to right): 0.85, 1.00, 1.03, 1.00, 3.02, 2.17, 2.90, 1.21, 5.02, 1.27.

Chemical structure of the compound is shown above the spectrum:

COC(=O)c1ccc(cc1[N+](=O)[O-])NC2CCCCC2

<sup>13</sup>C NMR spectrum (CDCl<sub>3</sub>) showing peaks at the following chemical shifts (ppm):

| Chemical Shift (ppm)       |
|----------------------------|
| 165.81                     |
| 147.02                     |
| 136.27                     |
| 131.12                     |
| 129.96                     |
| 116.77                     |
| 113.98                     |
| 77.16 (CDCl <sub>3</sub> ) |
| 52.19                      |
| 51.49                      |
| 32.69                      |
| 25.57                      |
| 24.39                      |

**Figure 5.**  $^1\text{H}$  NMR spectrum of **4**

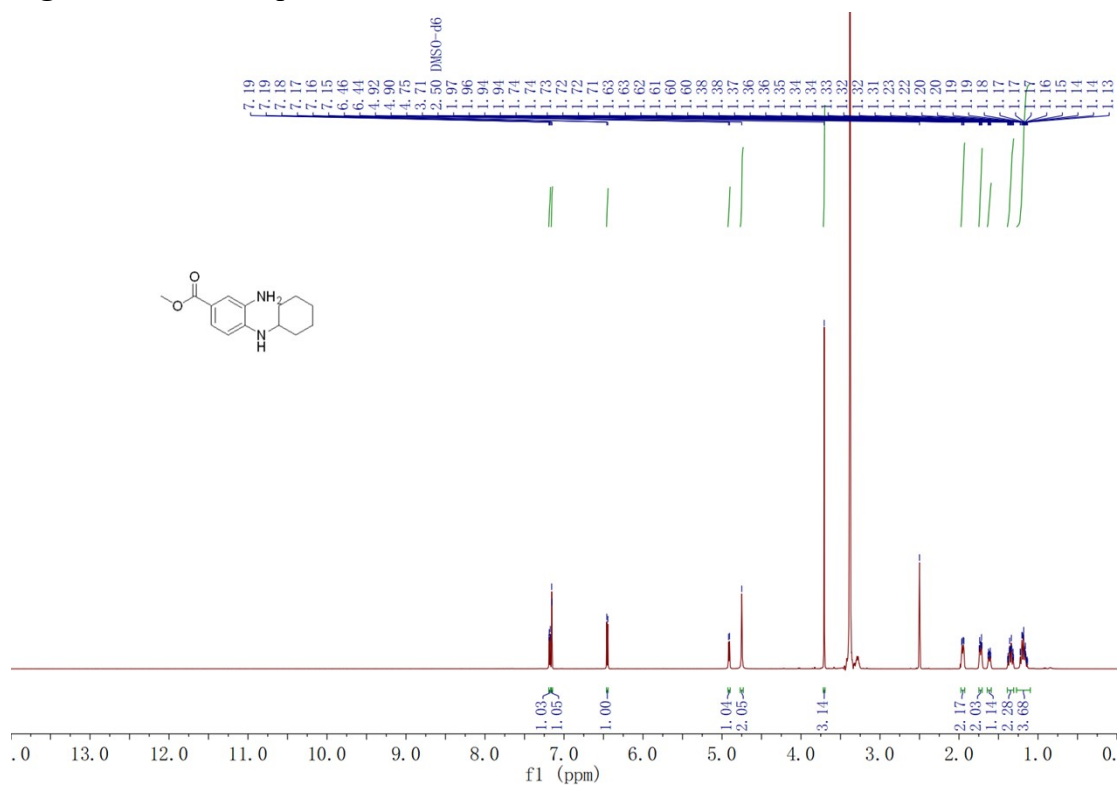

**Figure 6.**  $^{13}\text{C}$  NMR spectrum of **4**

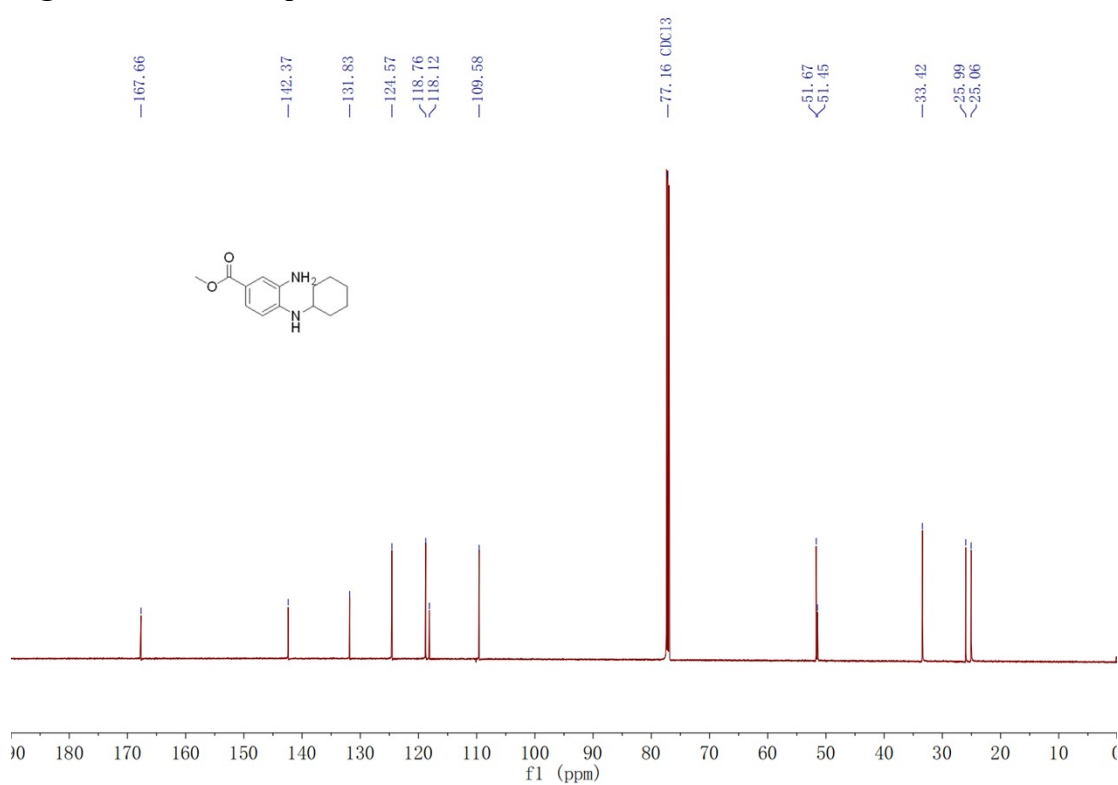

**Figure 7.**  $^1\text{H}$  NMR spectrum of **5**

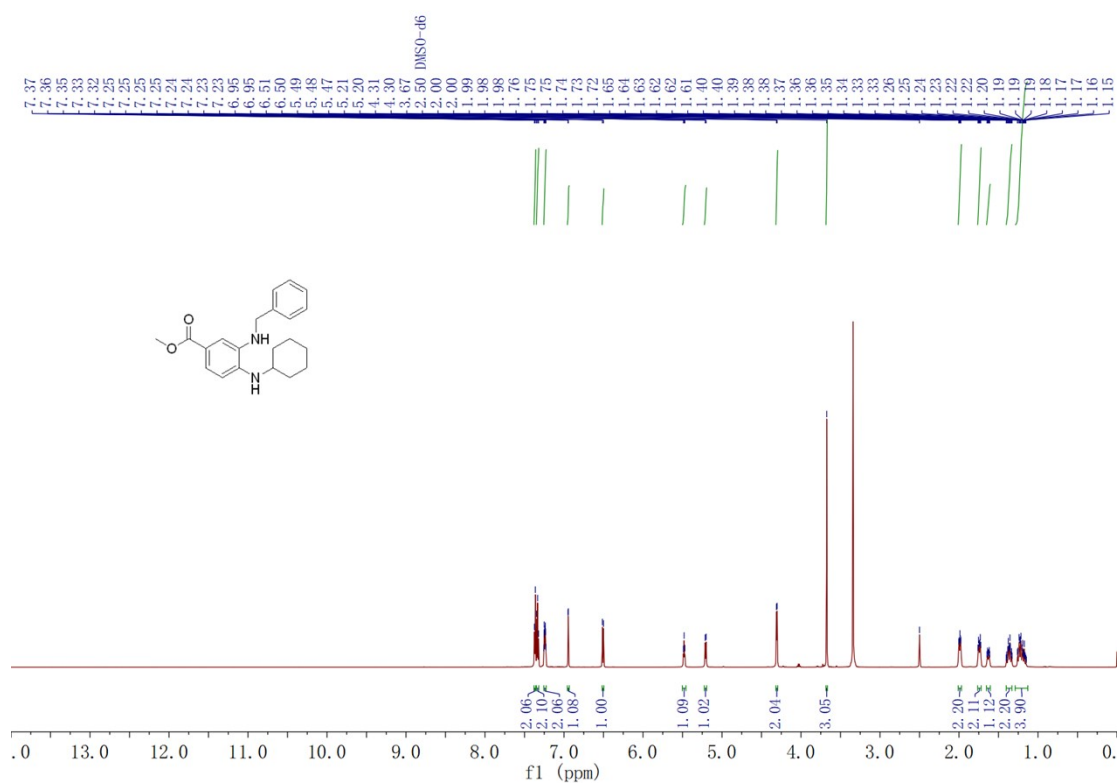

**Figure 8.**  $^{13}\text{C}$  NMR spectrum of **5**

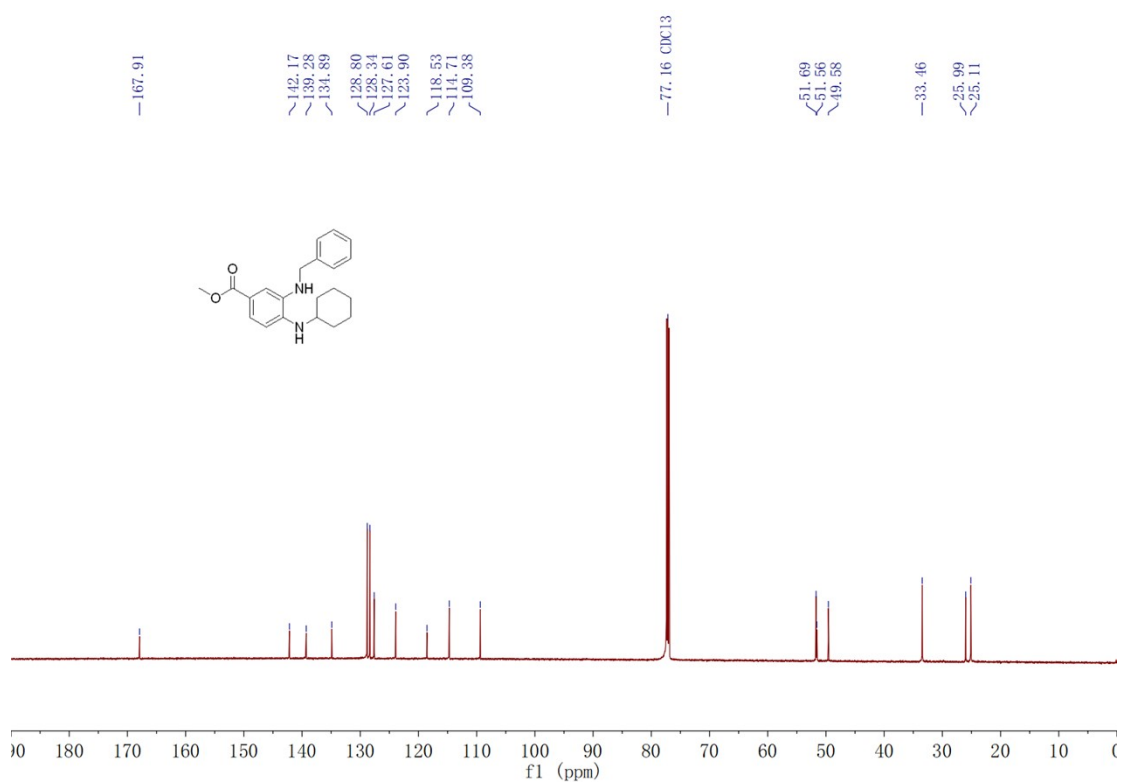

**Figure 9.**  $^1\text{H}$  NMR spectrum of **6**

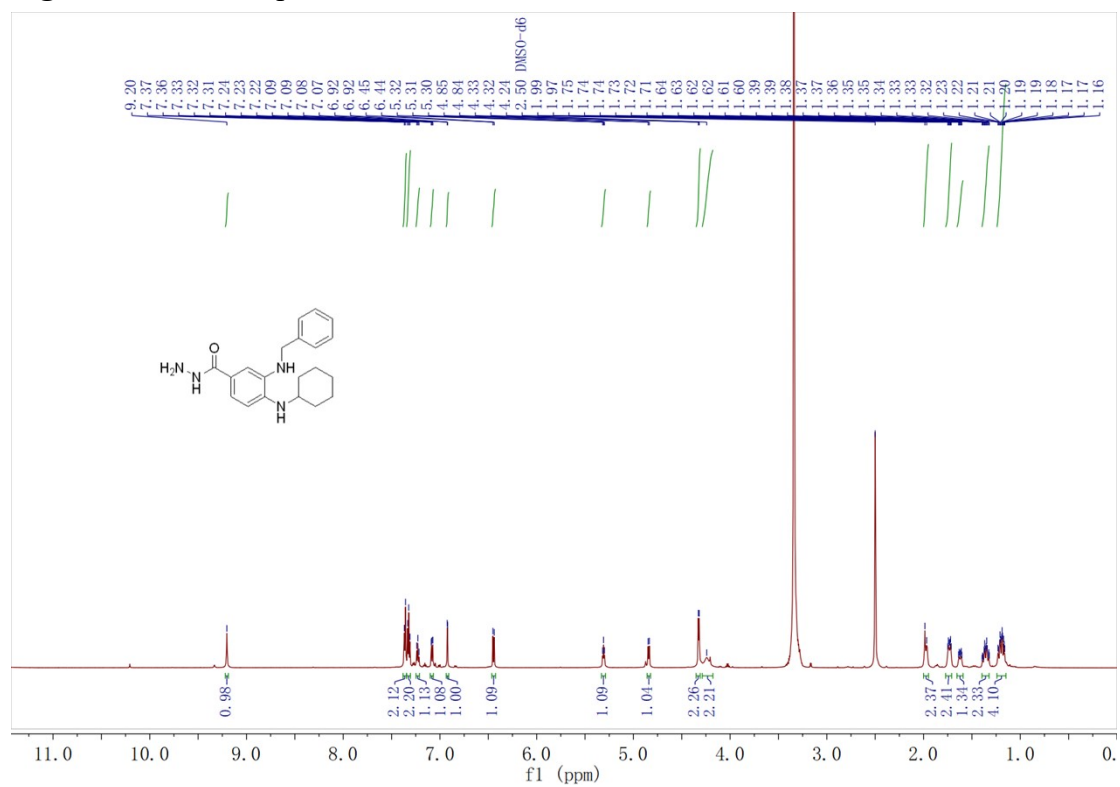

**Figure 10.**  $^{13}\text{C}$  NMR spectrum of **6**

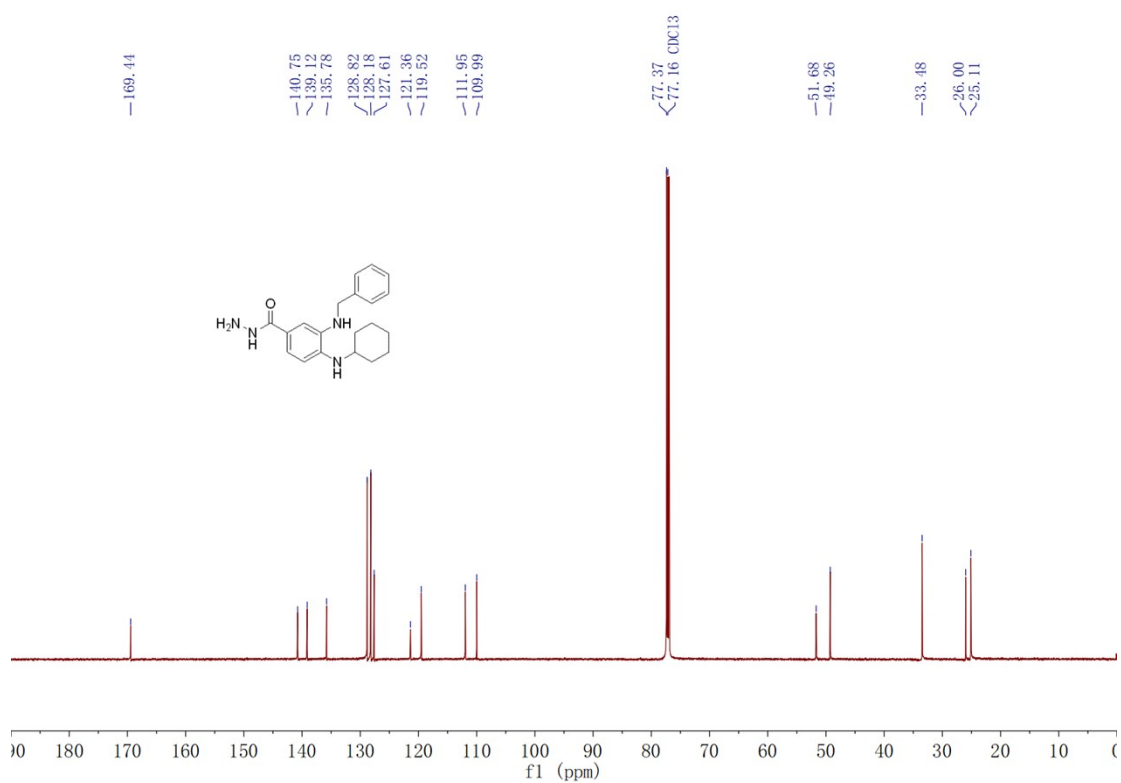

**Figure 11.**  $^1\text{H}$  NMR spectrum of **7**

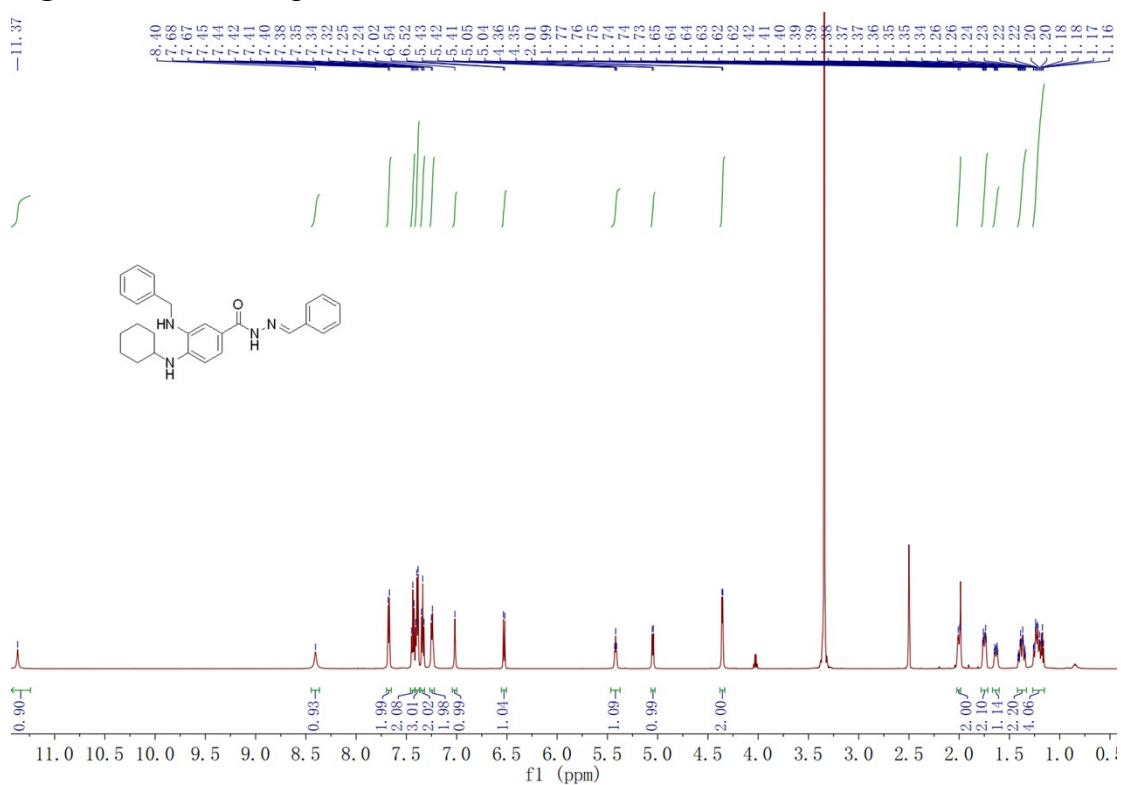

**Figure 12.**  $^{13}\text{C}$  NMR spectrum of **7**

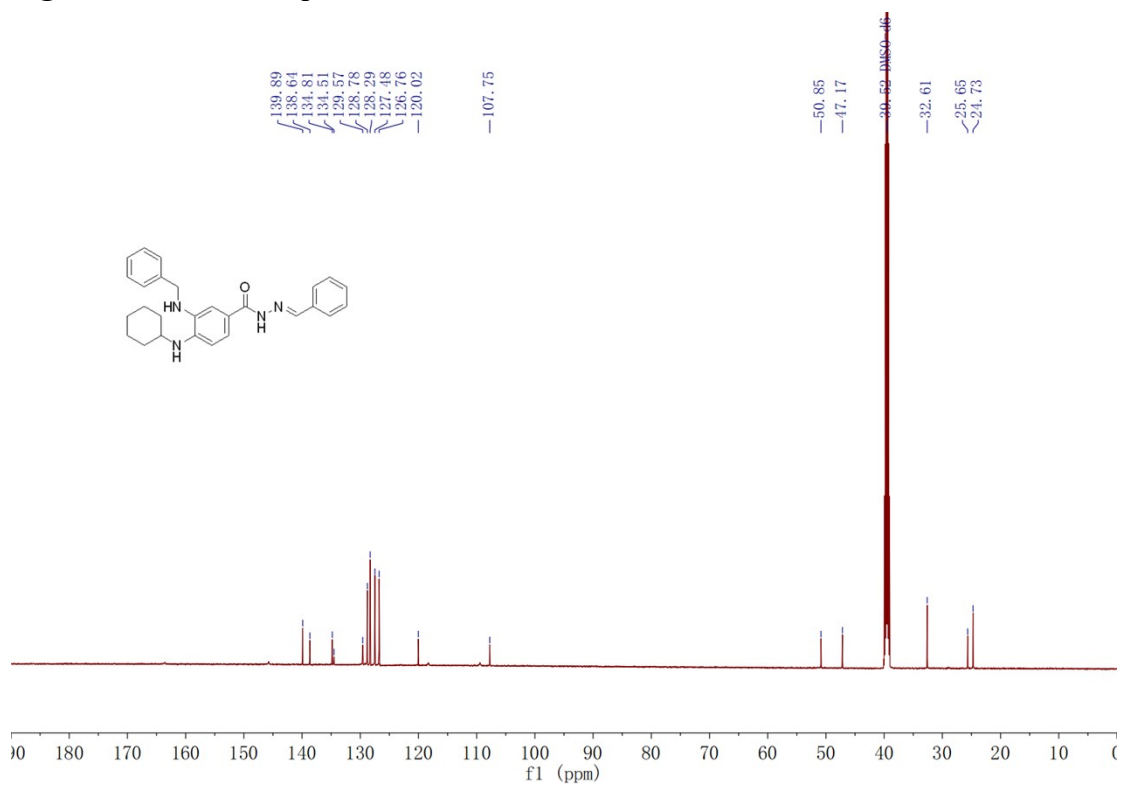

**Figure 13.**  $^1\text{H}$  NMR spectrum of **8**

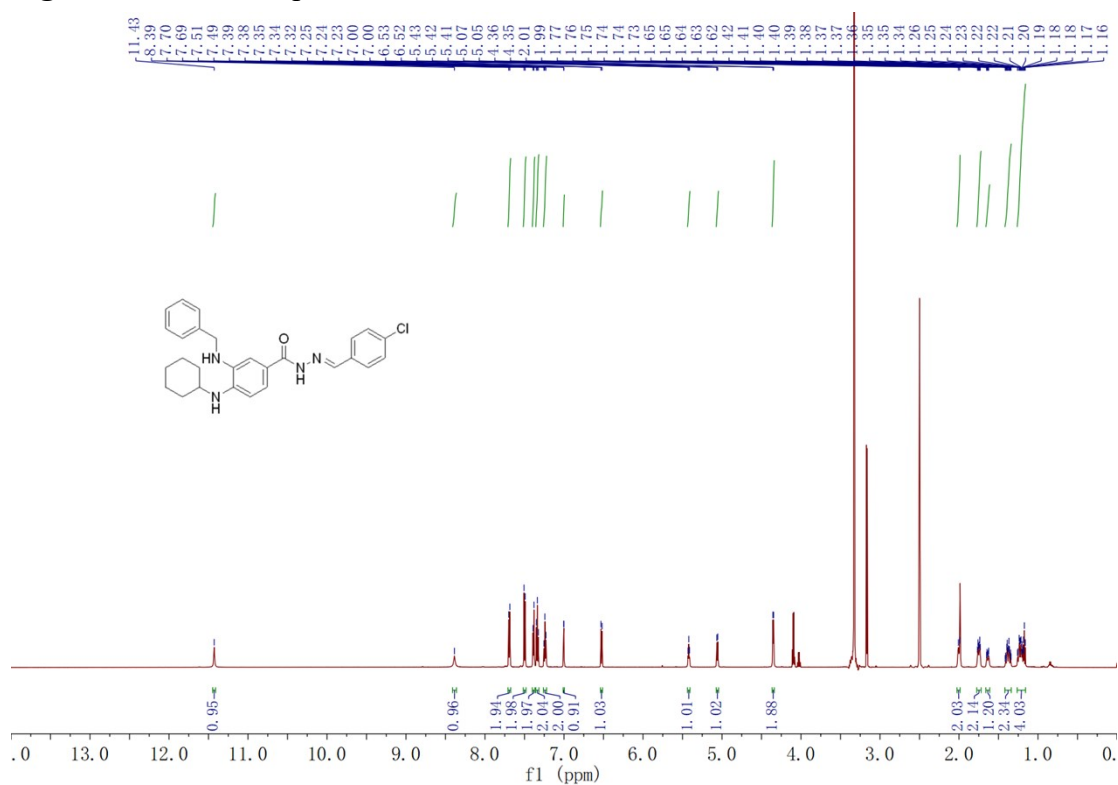

**Figure 14.**  $^{13}\text{C}$  NMR spectrum of **8**

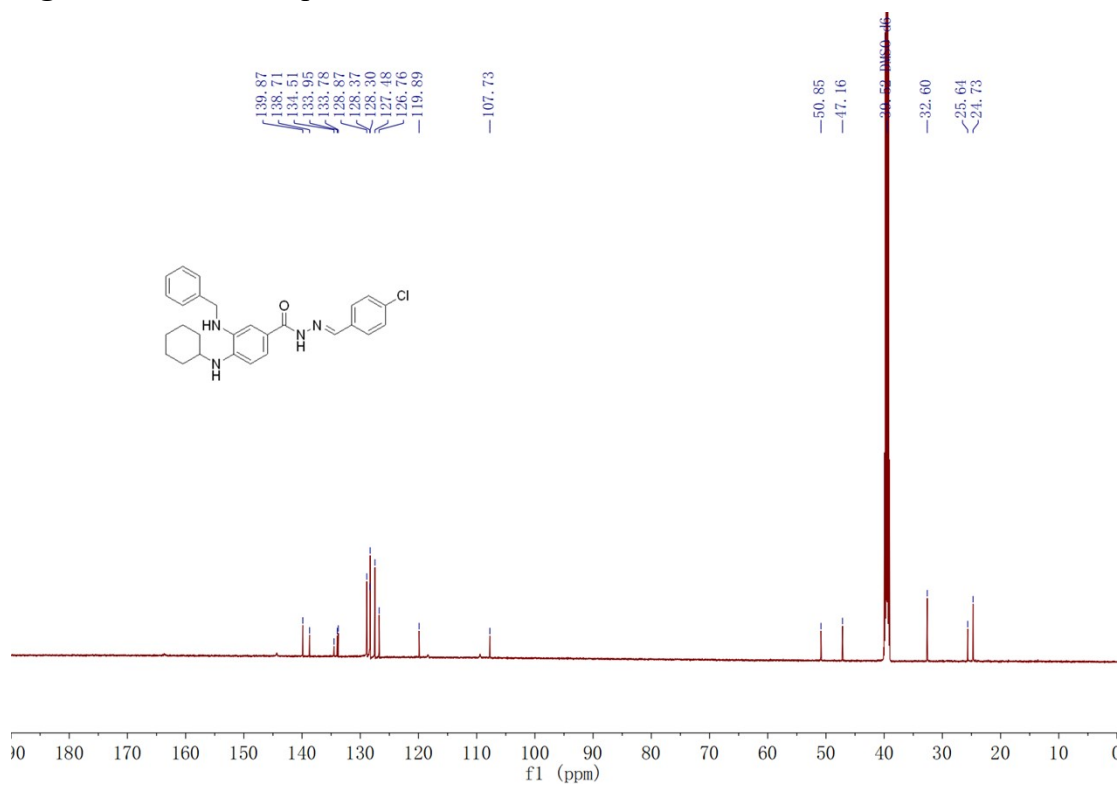

**Figure 15.**  $^1\text{H}$  NMR spectrum of **9**

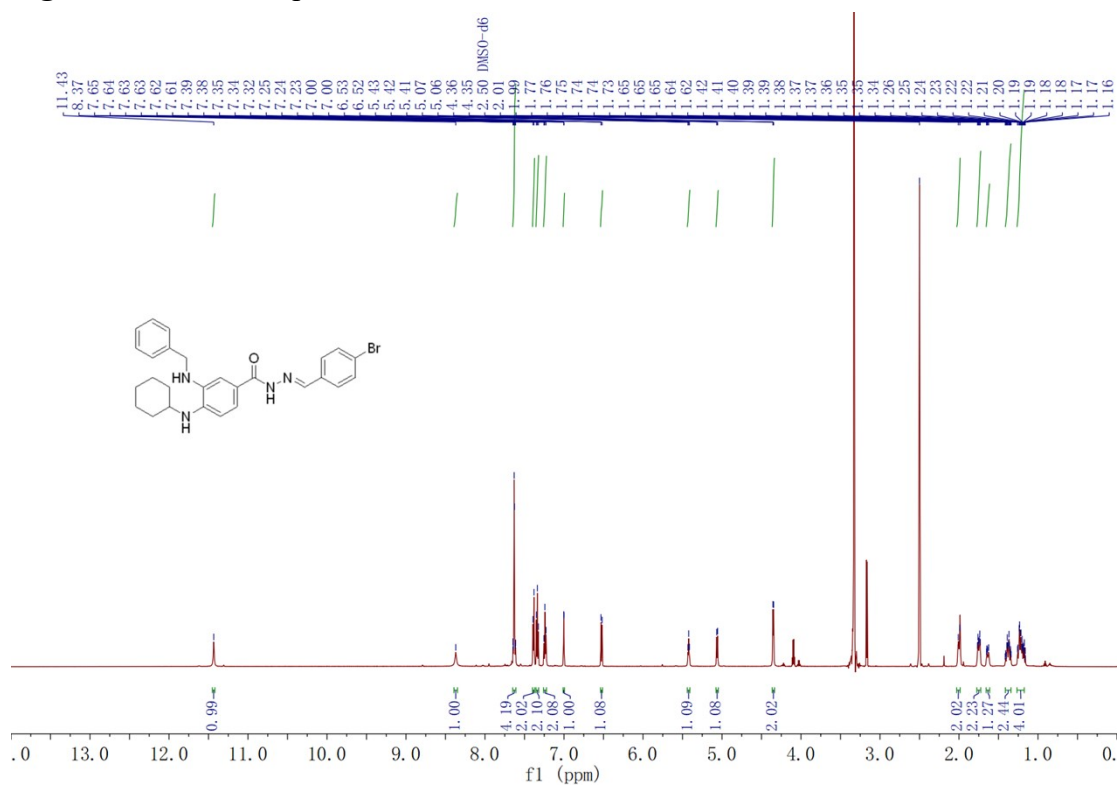

**Figure 16.**  $^{13}\text{C}$  NMR spectrum of **9**

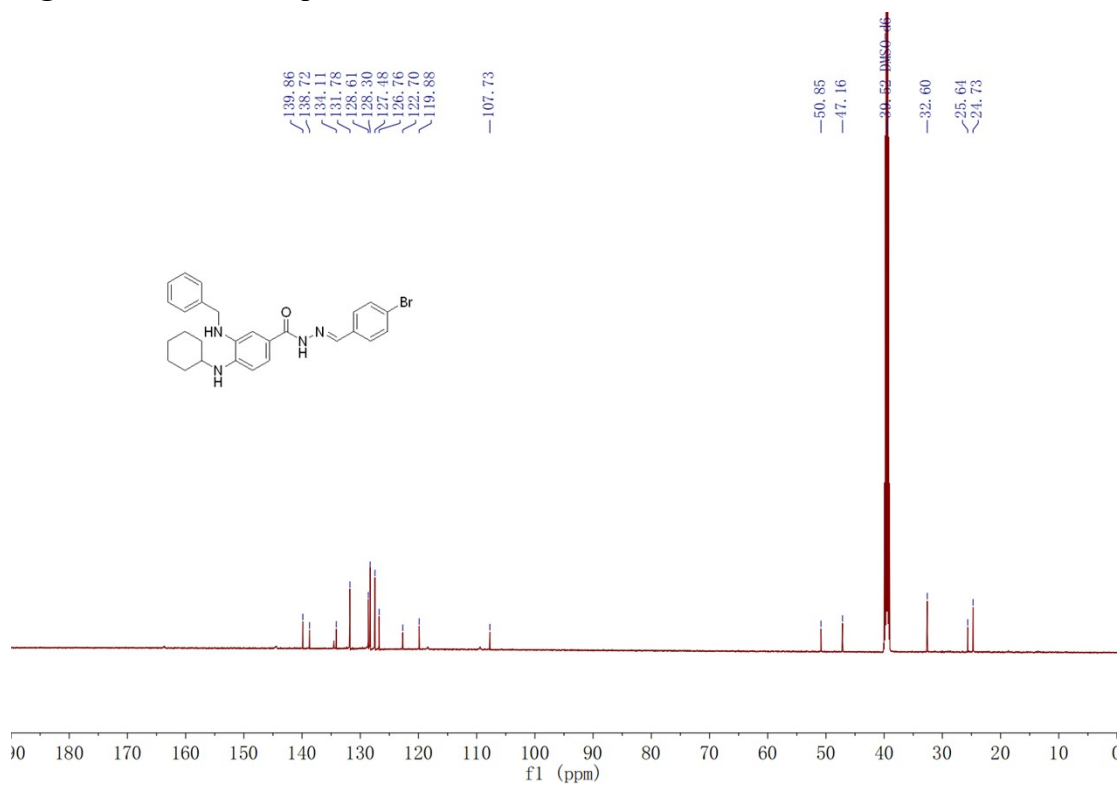

**Figure 17.**  $^1\text{H}$  NMR spectrum of **10**

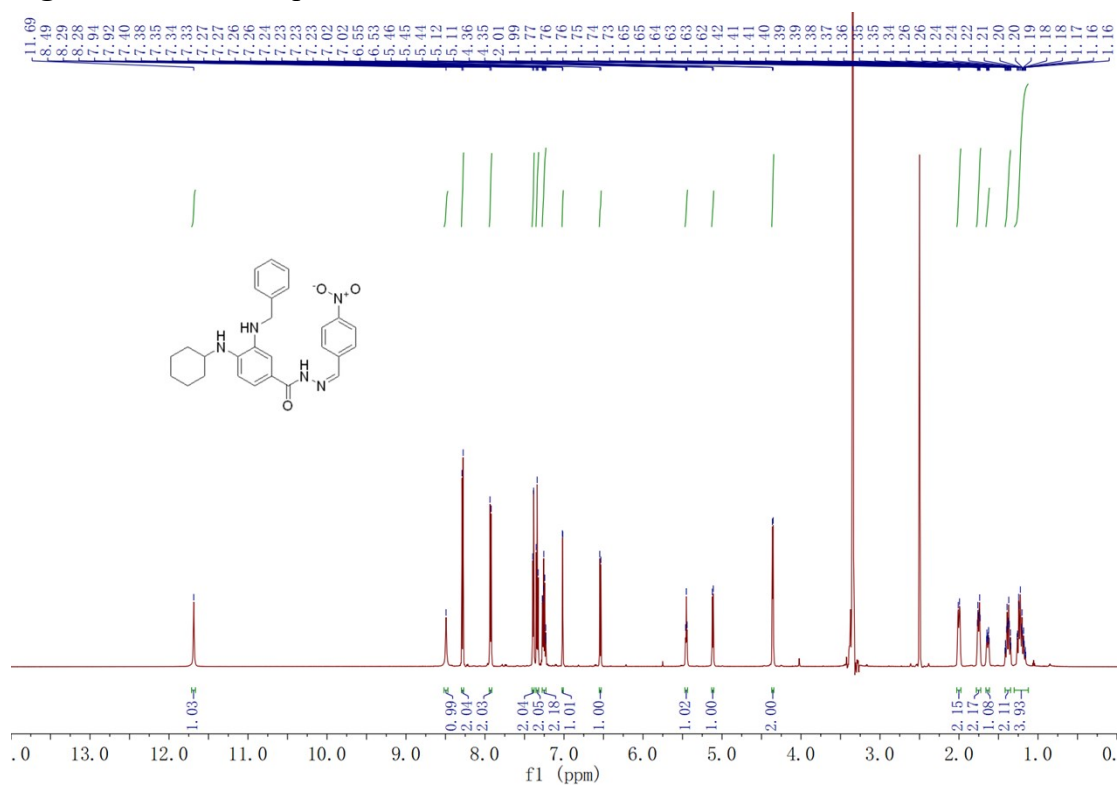

**Figure 18.**  $^{13}\text{C}$  NMR spectrum of **10**

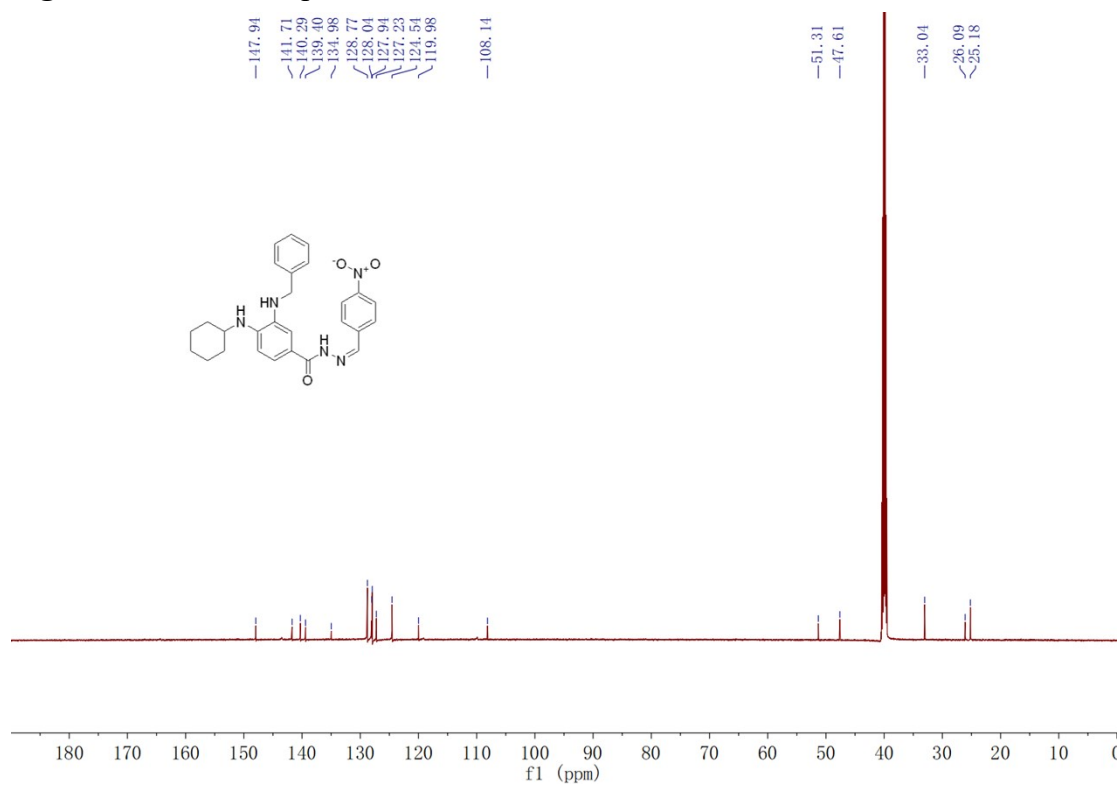

**Figure 19.**  $^1\text{H}$  NMR spectrum of **11**

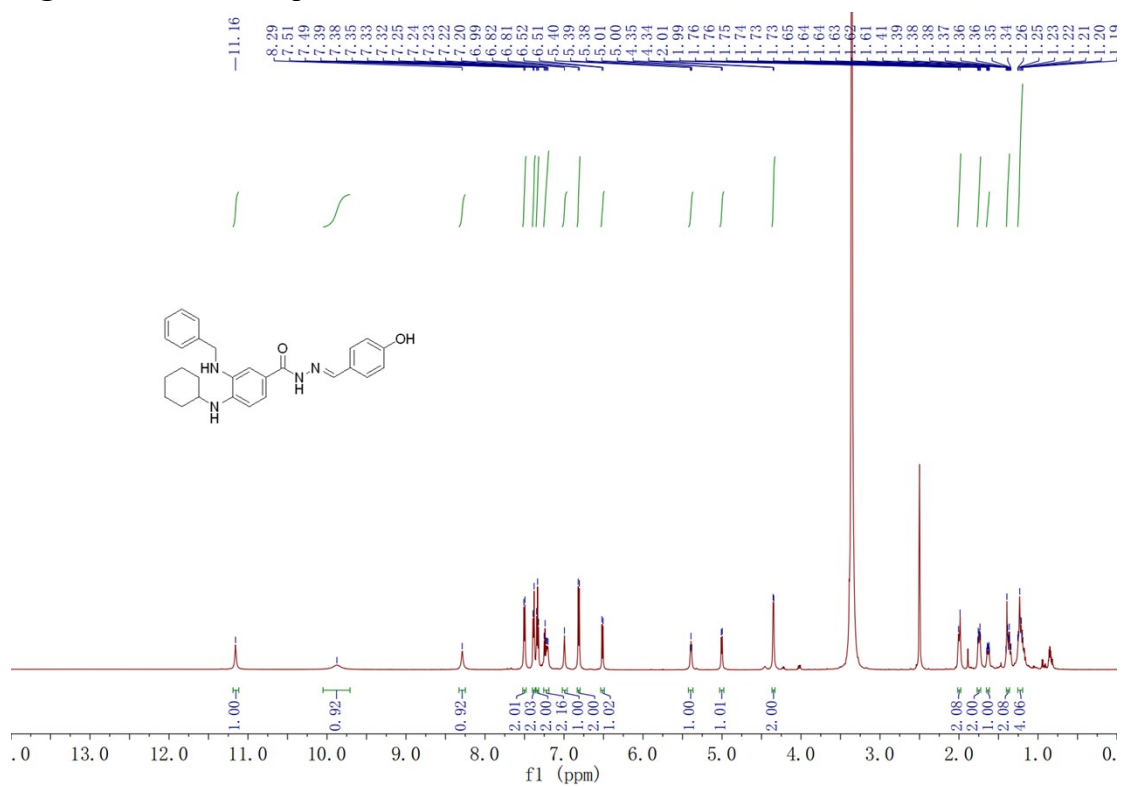

**Figure 20.**  $^{13}\text{C}$  NMR spectrum of **11**

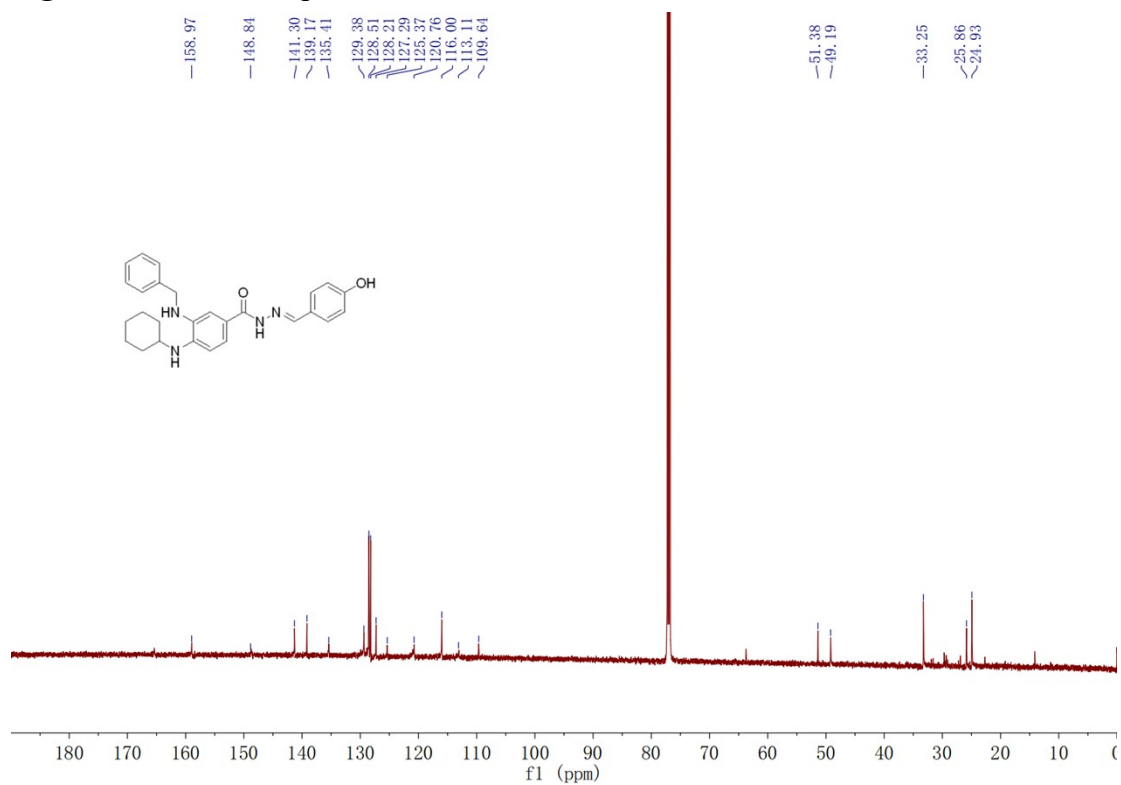

**Figure 21.**  $^1\text{H}$  NMR spectrum of **12**

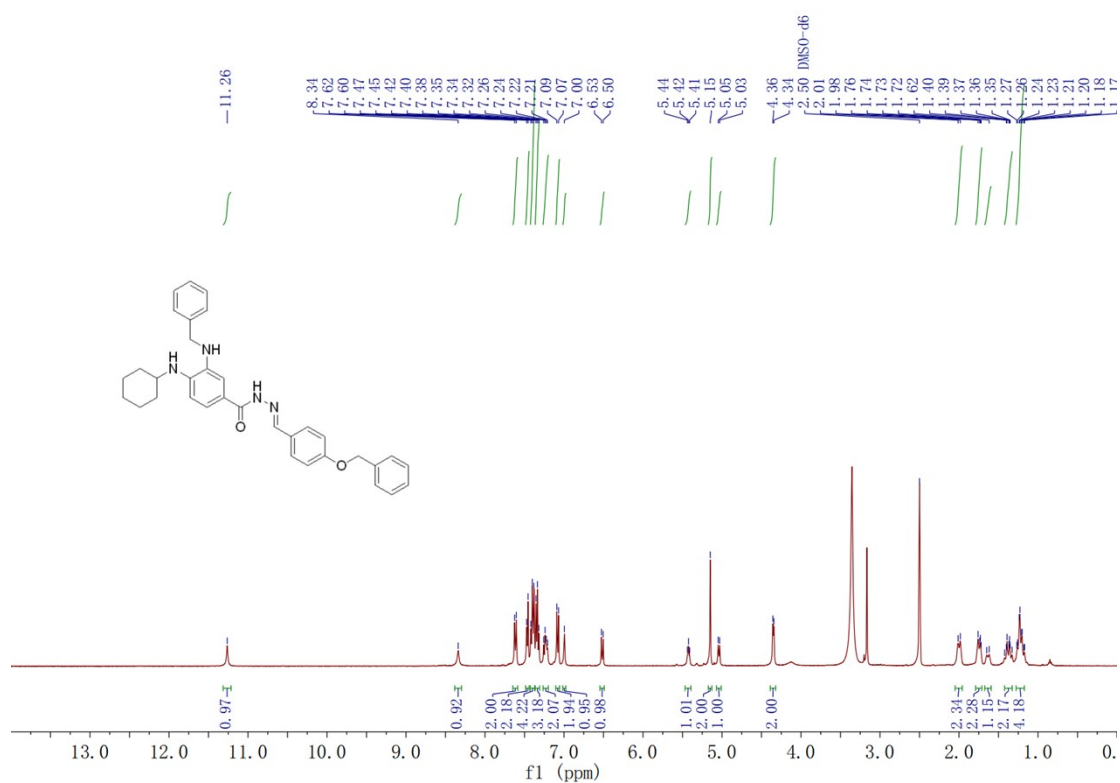

**Figure 22.**  $^{13}\text{C}$  NMR spectrum of **12**

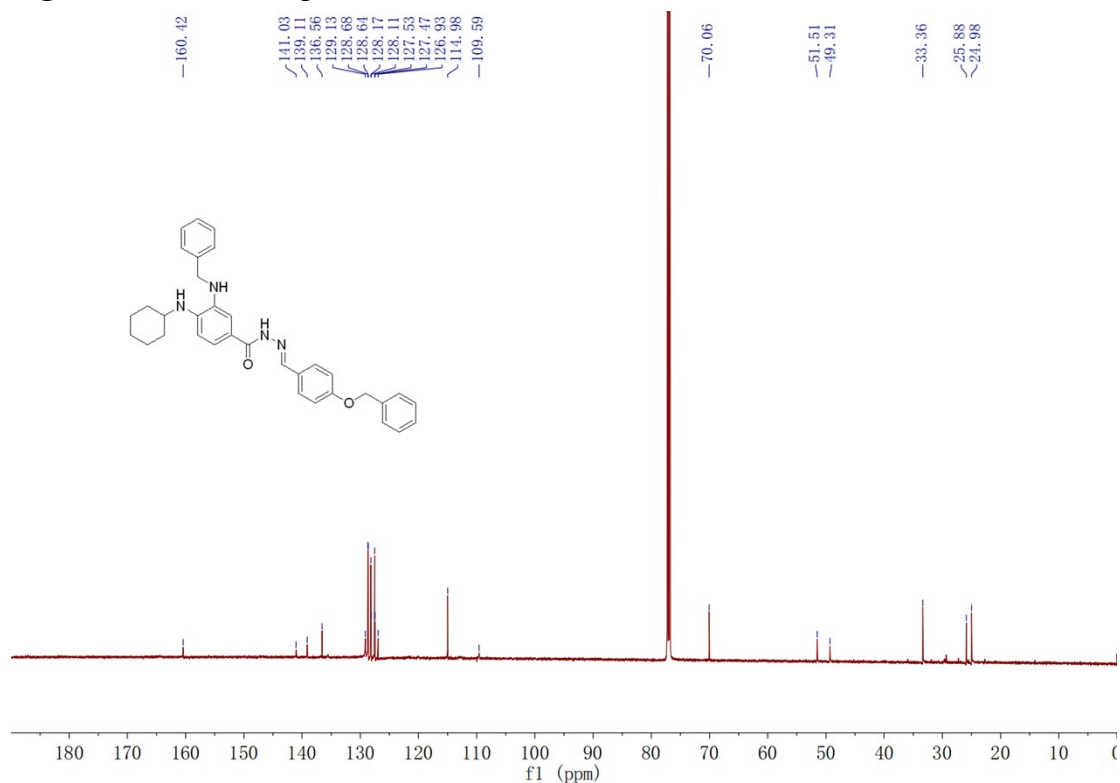

**Figure 23.**  $^1\text{H}$  NMR spectrum of **13**

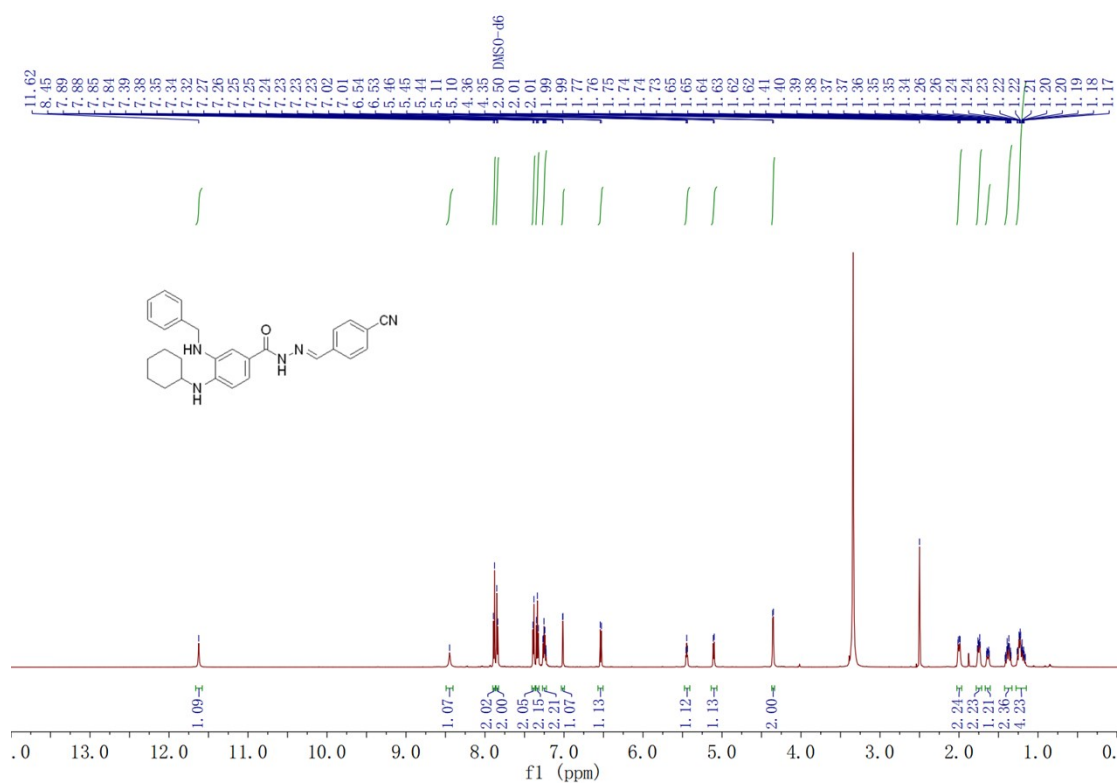

**Figure 24.**  $^{13}\text{C}$  NMR spectrum of **13**

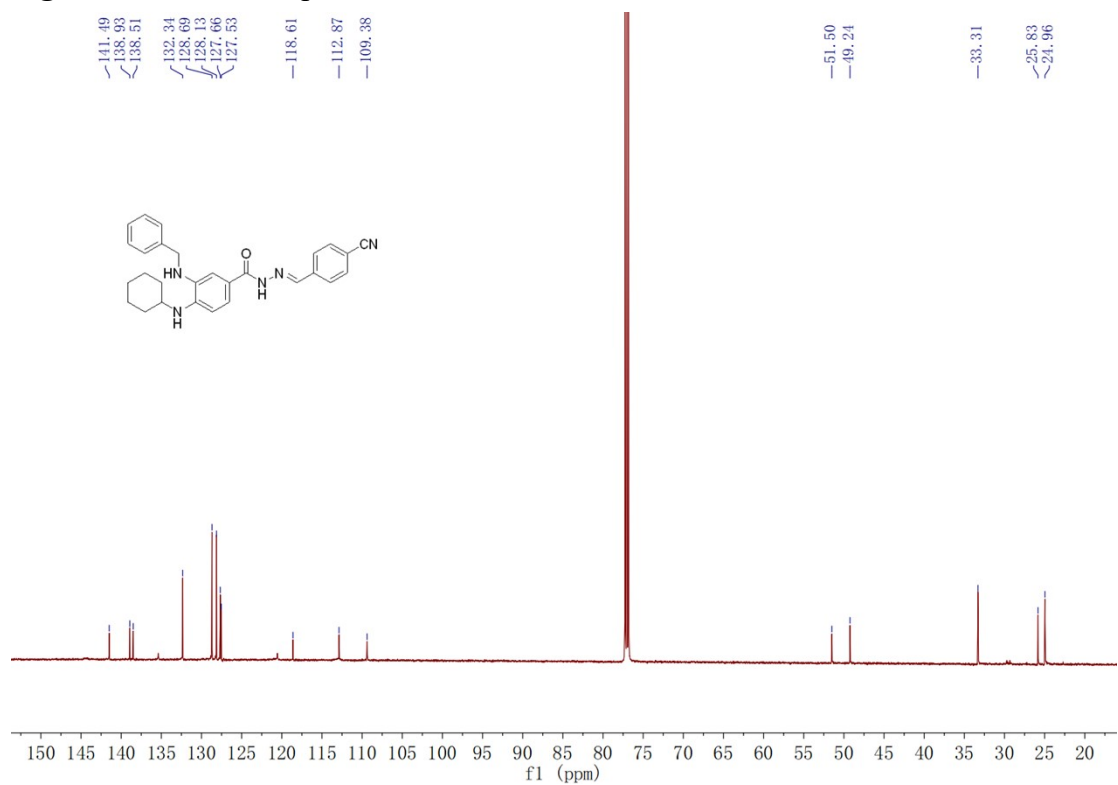

**Figure 25.**  $^1\text{H}$  NMR spectrum of **14**

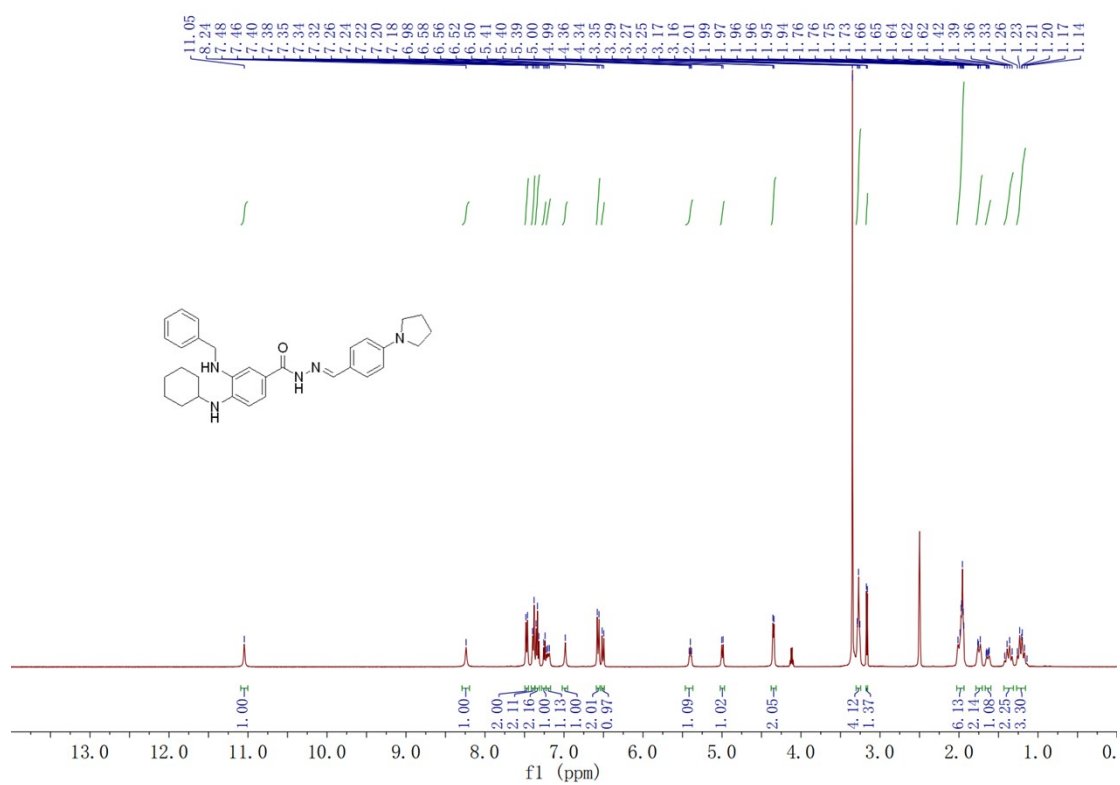

**Figure 26.**  $^{13}\text{C}$  NMR spectrum of **14**

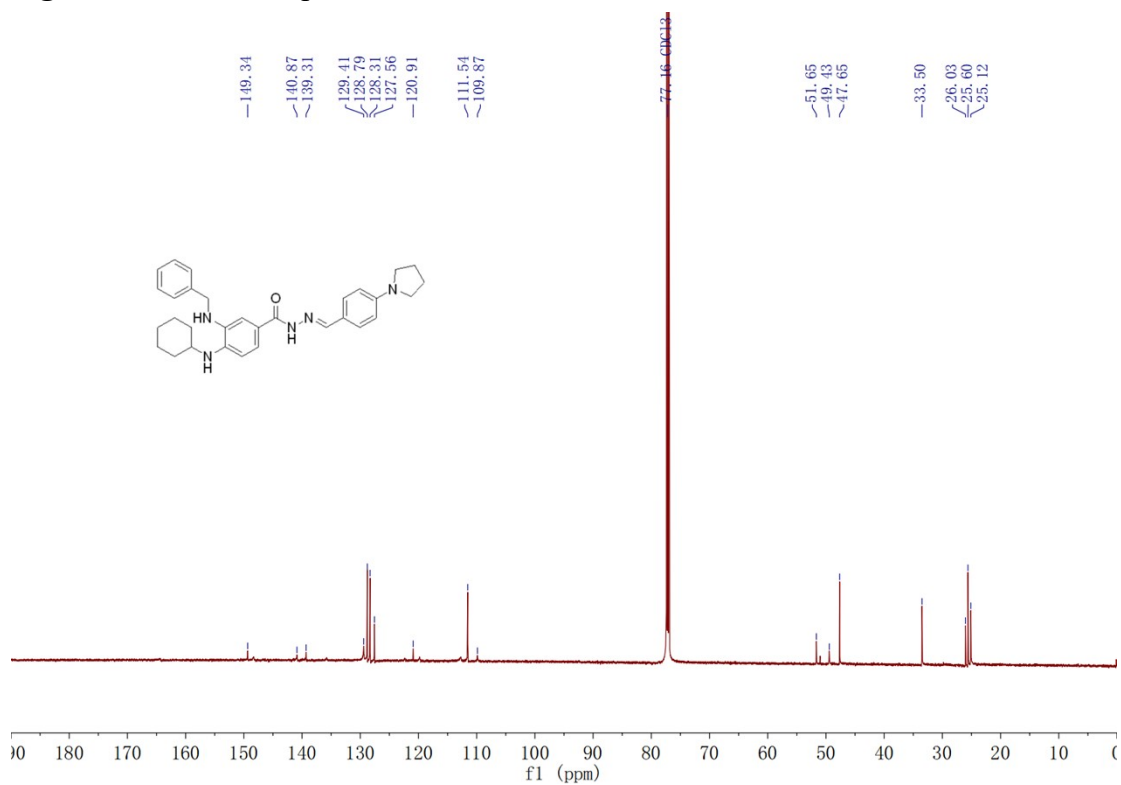

**Figure 27.**  $^1\text{H}$  NMR spectrum of **15**

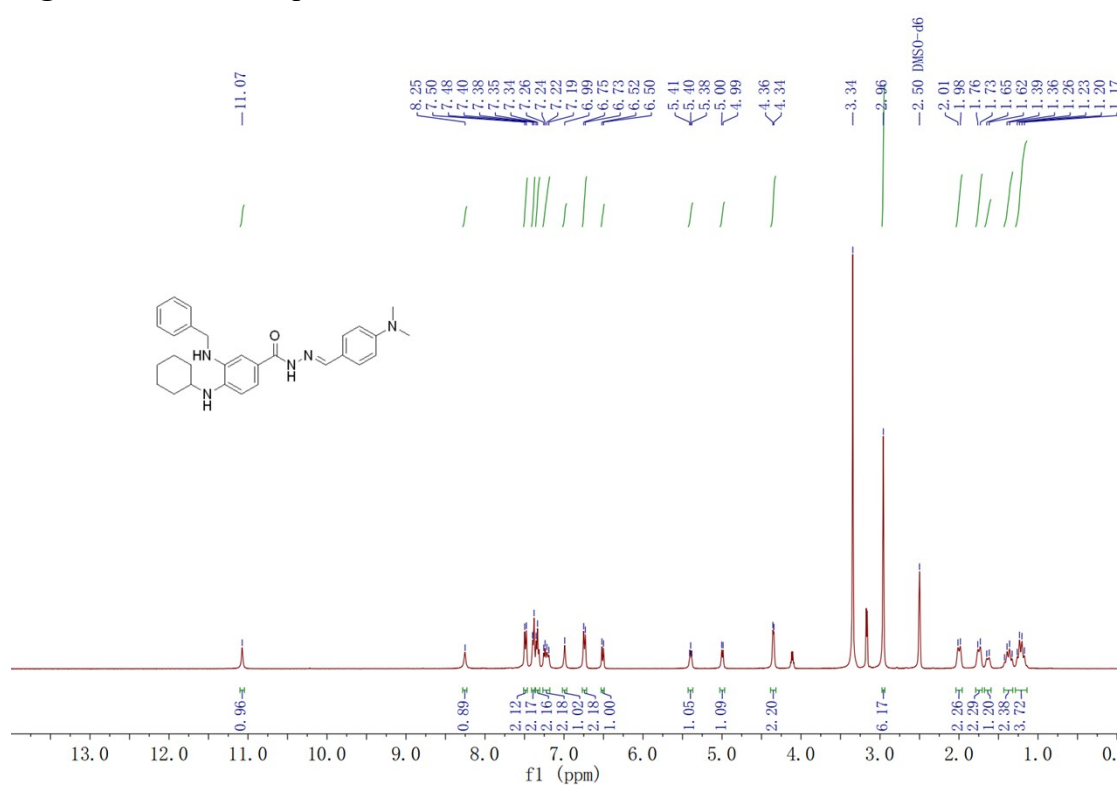

**Figure 28.**  $^{13}\text{C}$  NMR spectrum of **15**

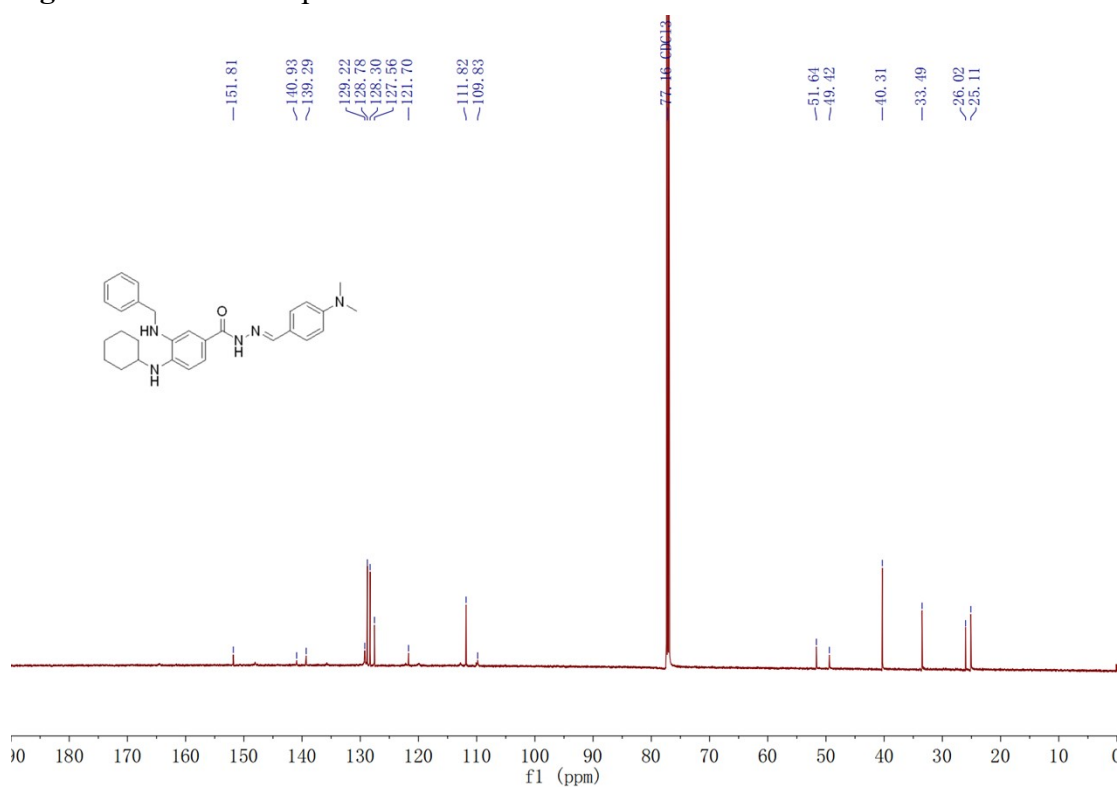

**Figure 29.**  $^1\text{H}$  NMR spectrum of **16**

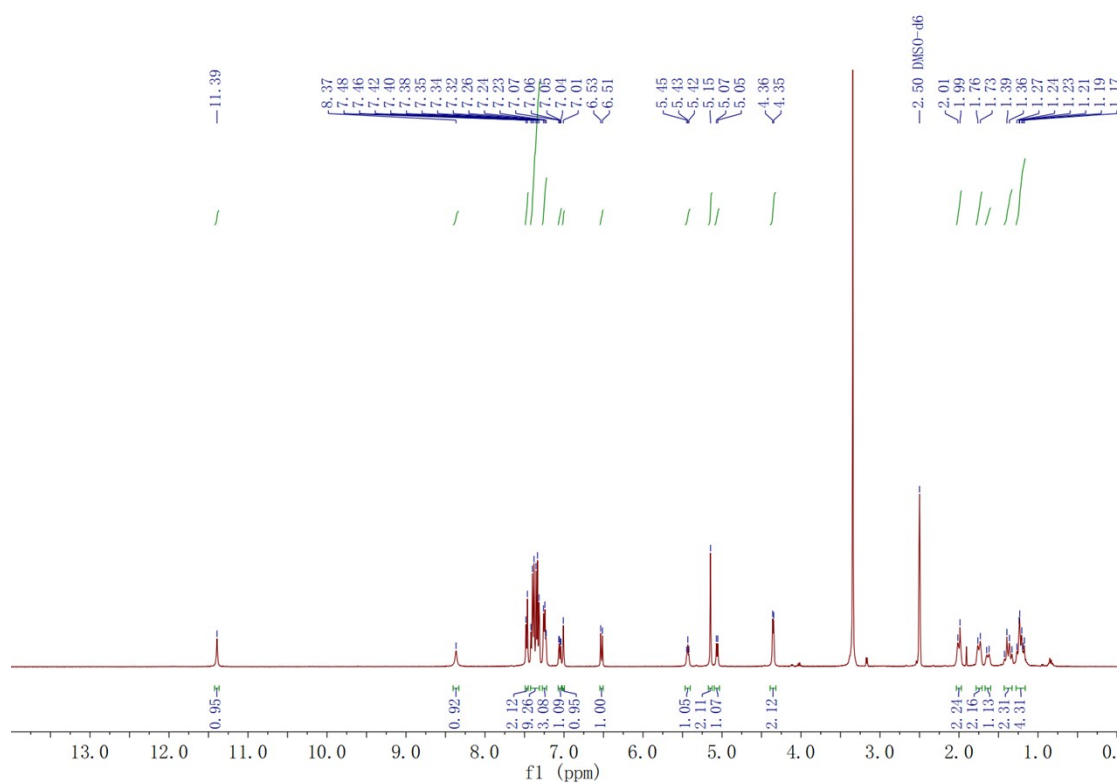

**Figure 30.**  $^{13}\text{C}$  NMR spectrum of **16**

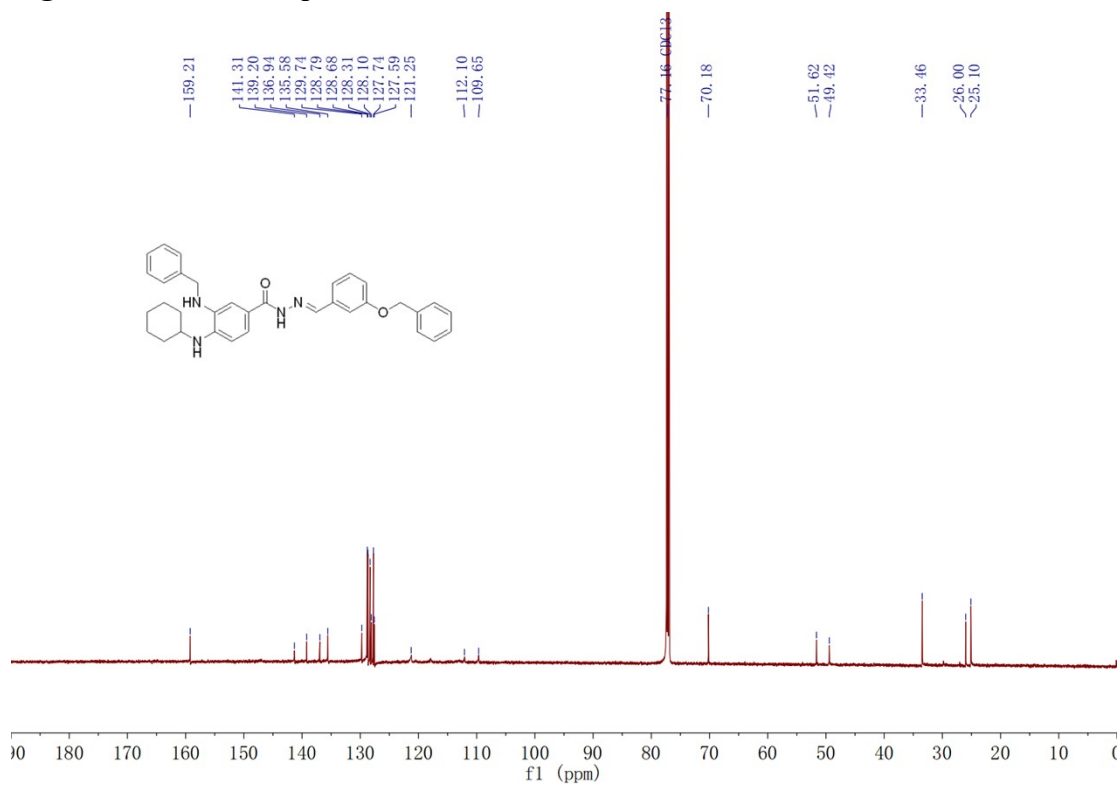

**Figure 31.**  $^1\text{H}$  NMR spectrum of **17**

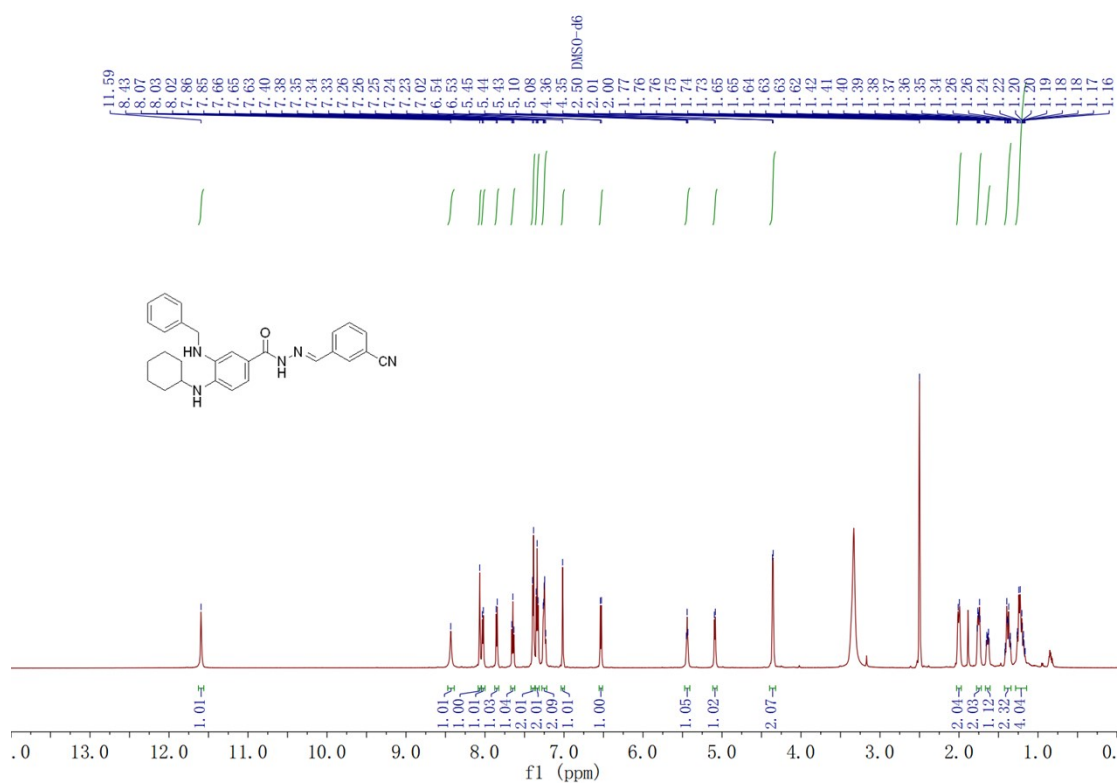

**Figure 32.**  $^{13}\text{C}$  NMR spectrum of **17**

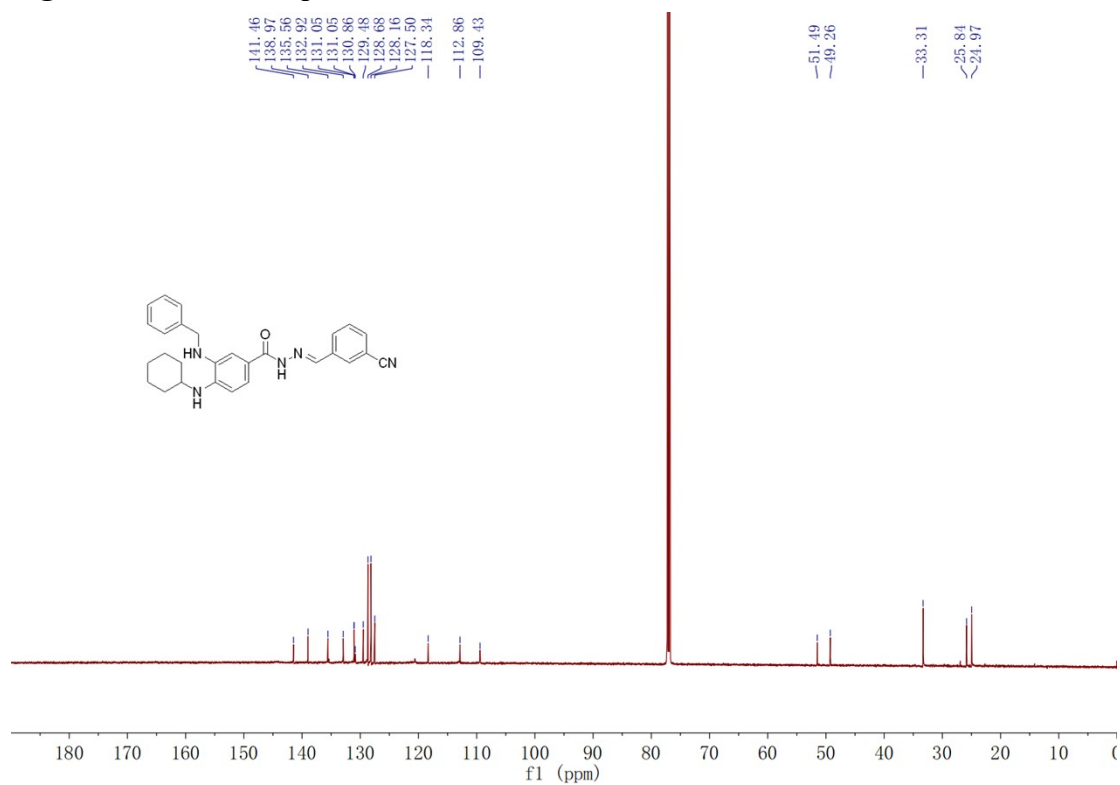

**Figure 33.**  $^1\text{H}$  NMR spectrum of **18**

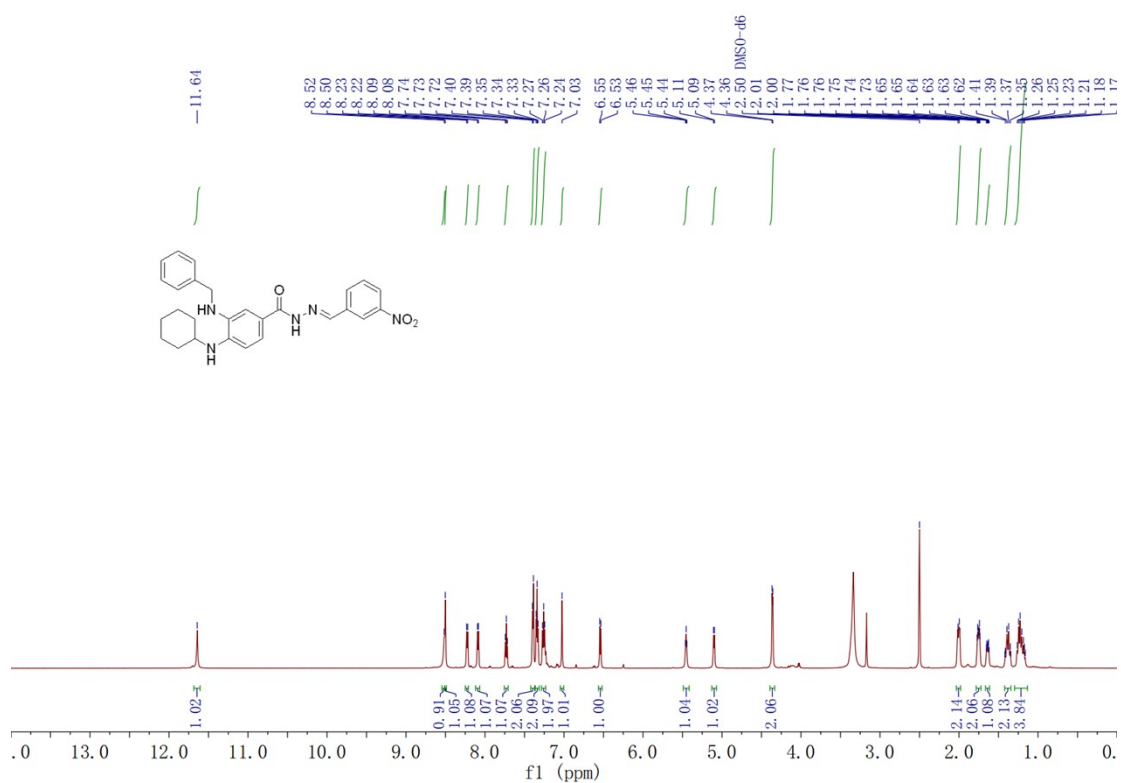

**Figure 34.**  $^{13}\text{C}$  NMR spectrum of **18**

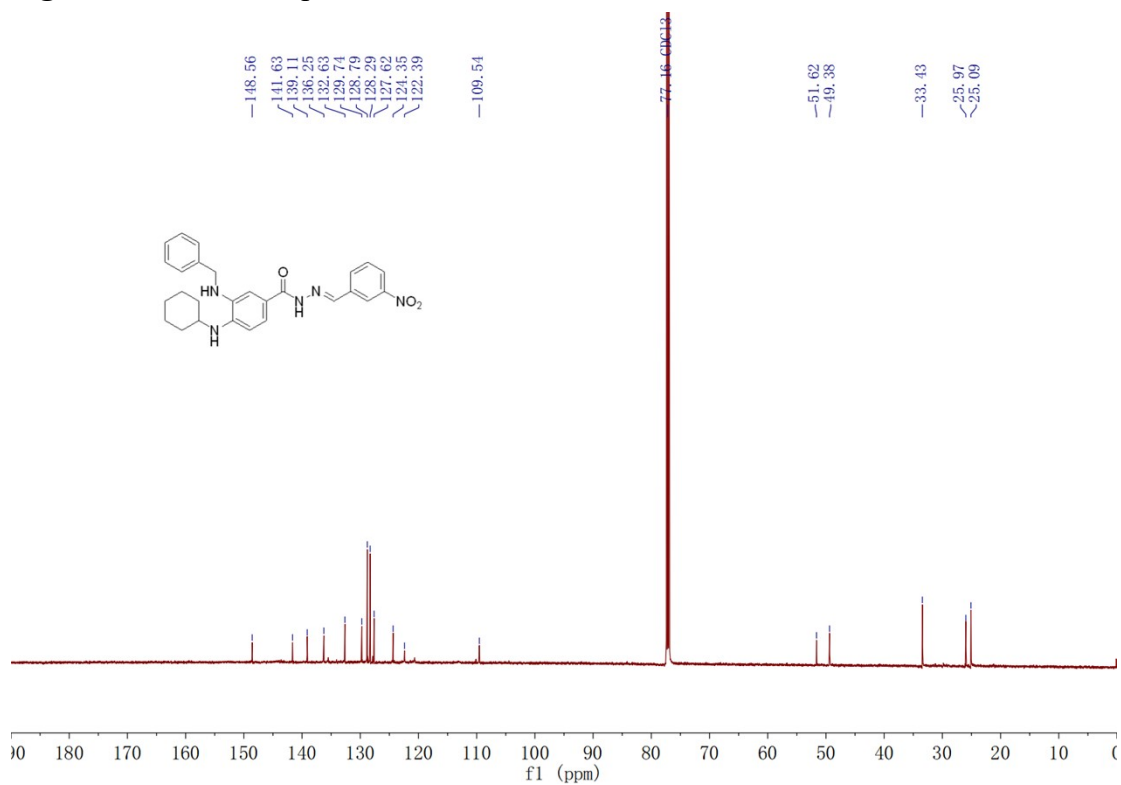

**Figure 35.**  $^1\text{H}$  NMR spectrum of **19**

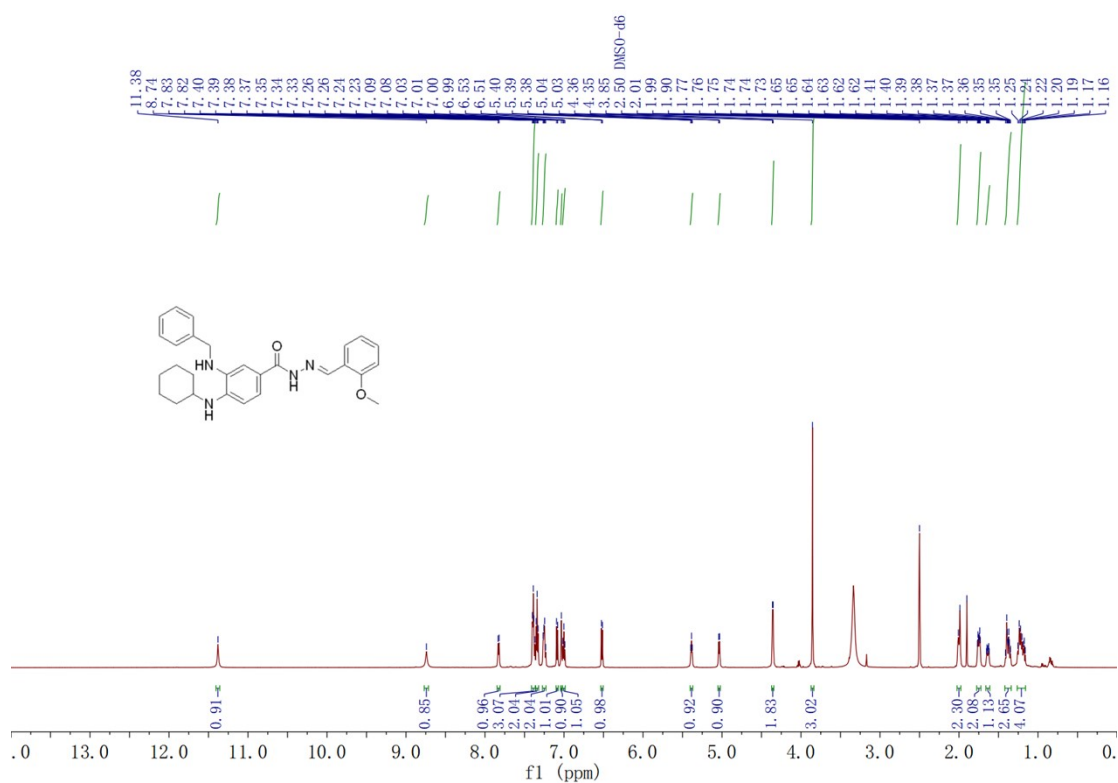

**Figure 36.**  $^{13}\text{C}$  NMR spectrum of **19**

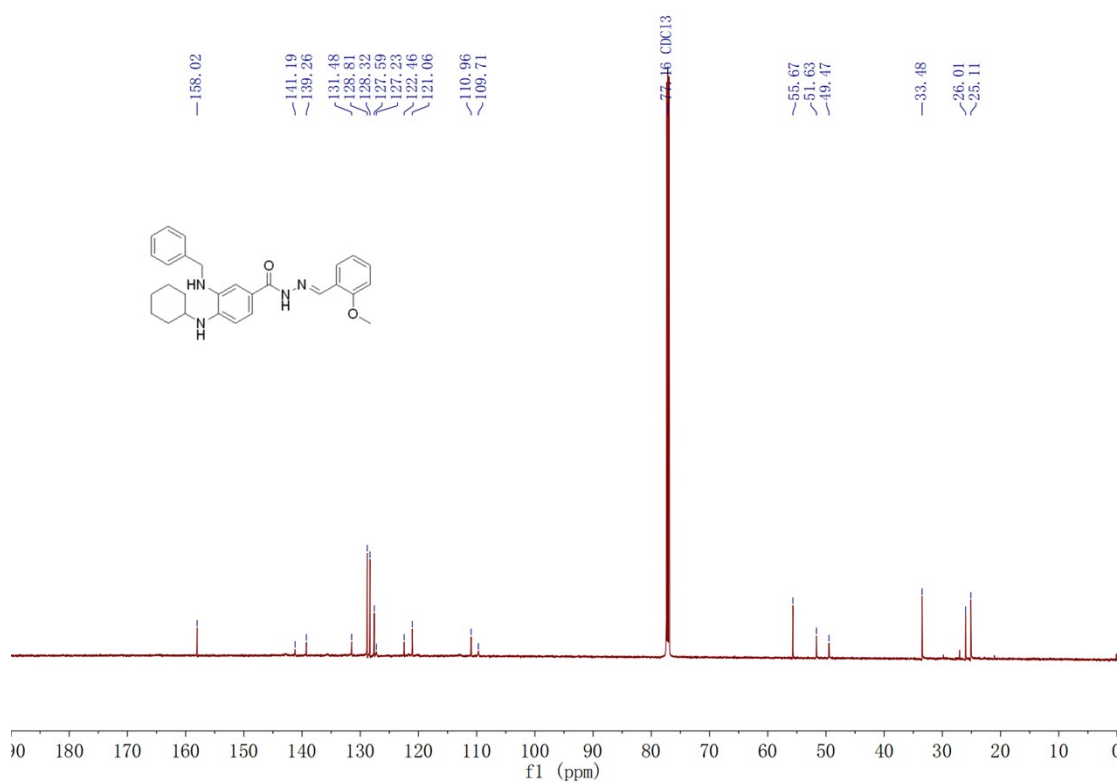

**Figure 37.**  $^1\text{H}$  NMR spectrum of **20**

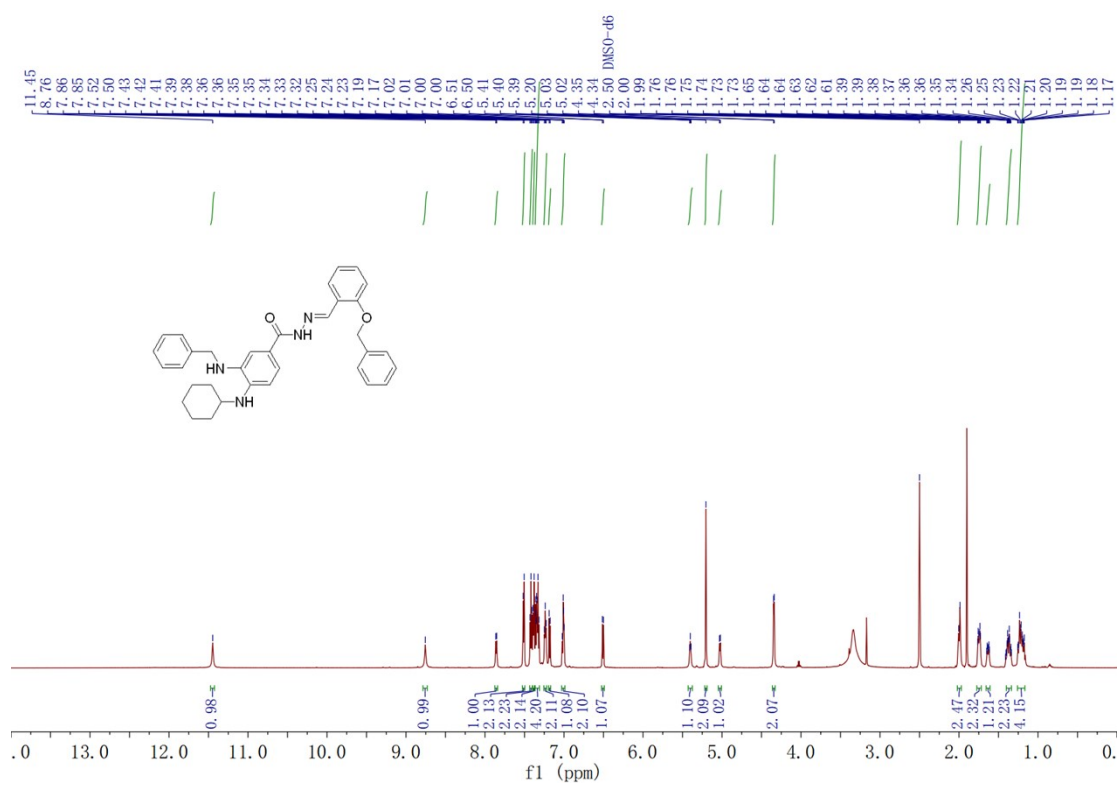

**Figure 38.**  $^{13}\text{C}$  NMR spectrum of **20**

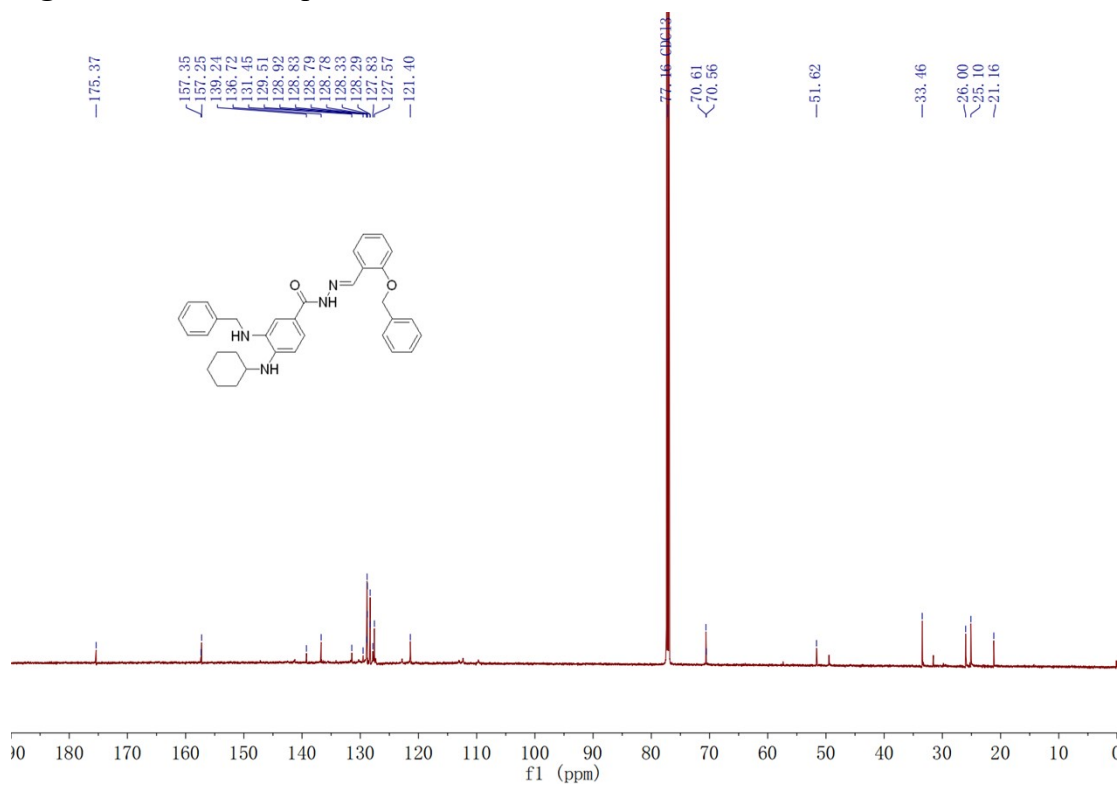

**Figure 39.**  $^1\text{H}$  NMR spectrum of **21**

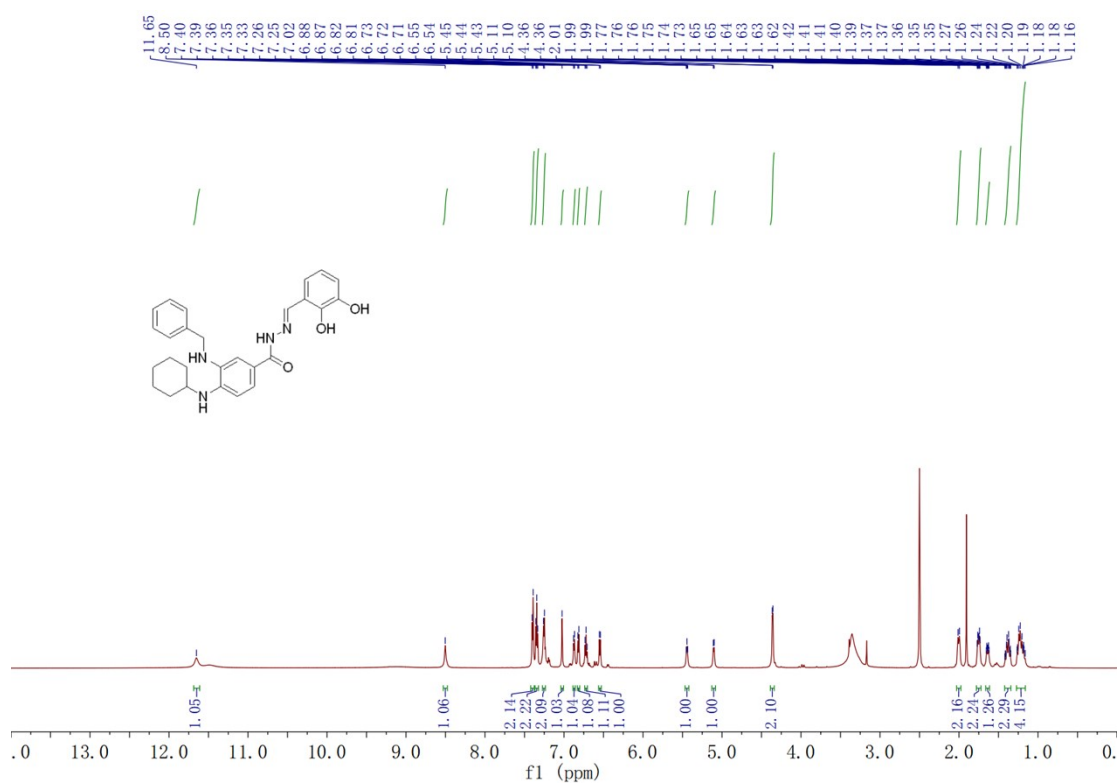

**Figure 40.**  $^{13}\text{C}$  NMR spectrum of **21**

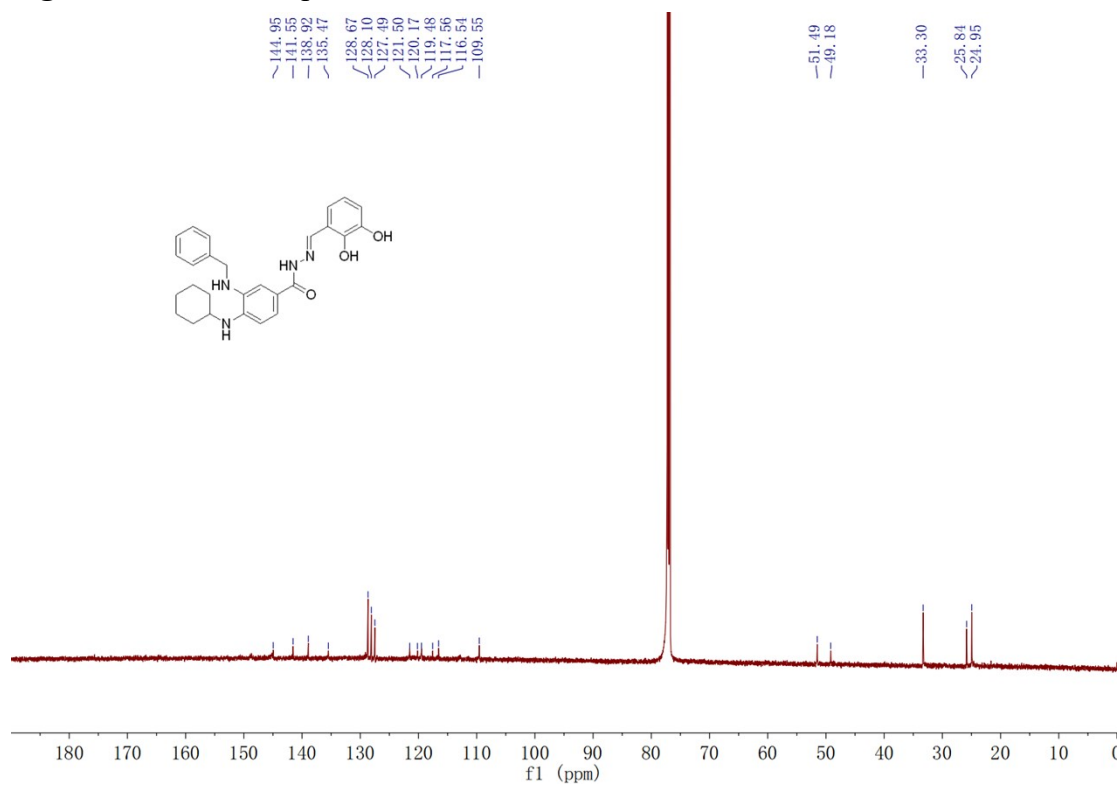

**Figure 41.**  $^1\text{H}$  NMR spectrum of **22**

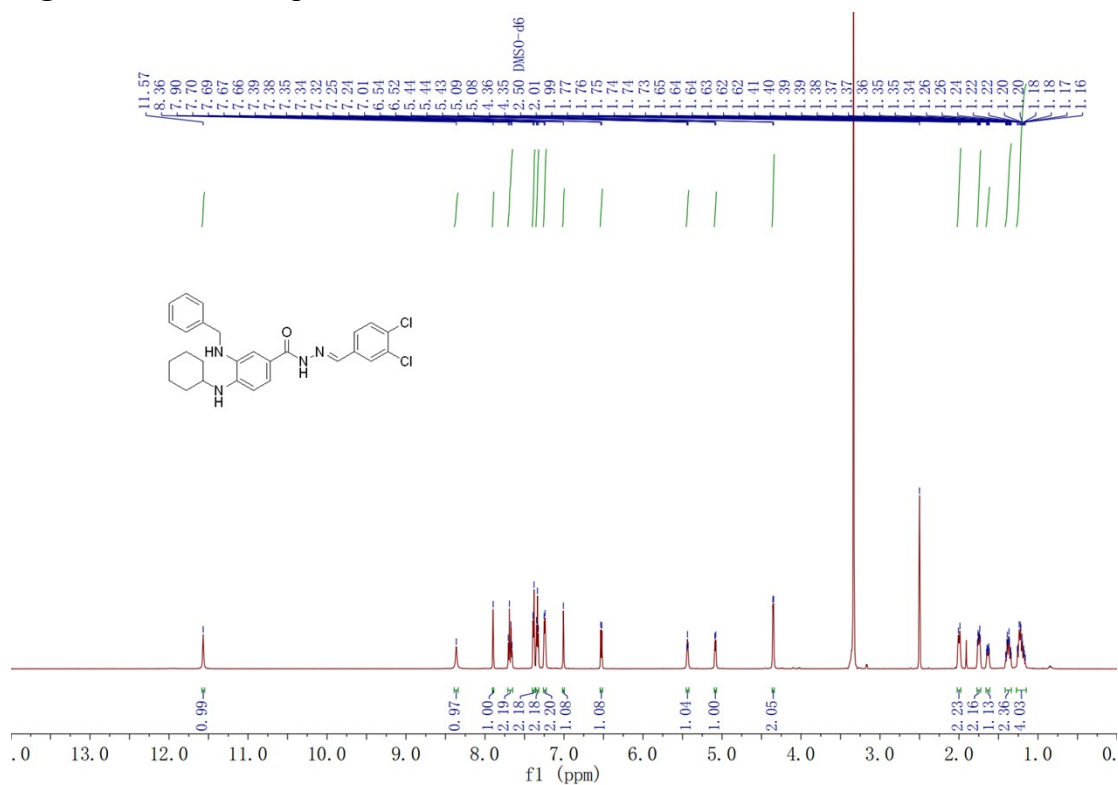

**Figure 42.**  $^{13}\text{C}$  NMR spectrum of **22**

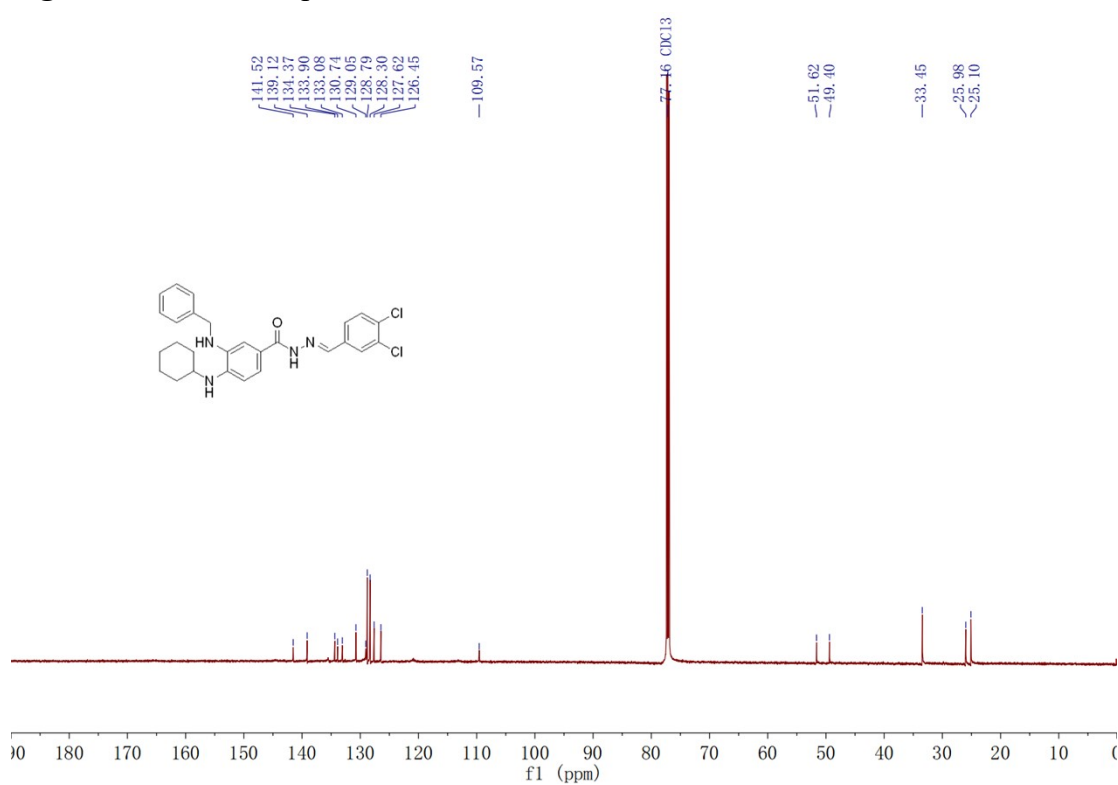

**Figure 43.**  $^1\text{H}$  NMR spectrum of **23**

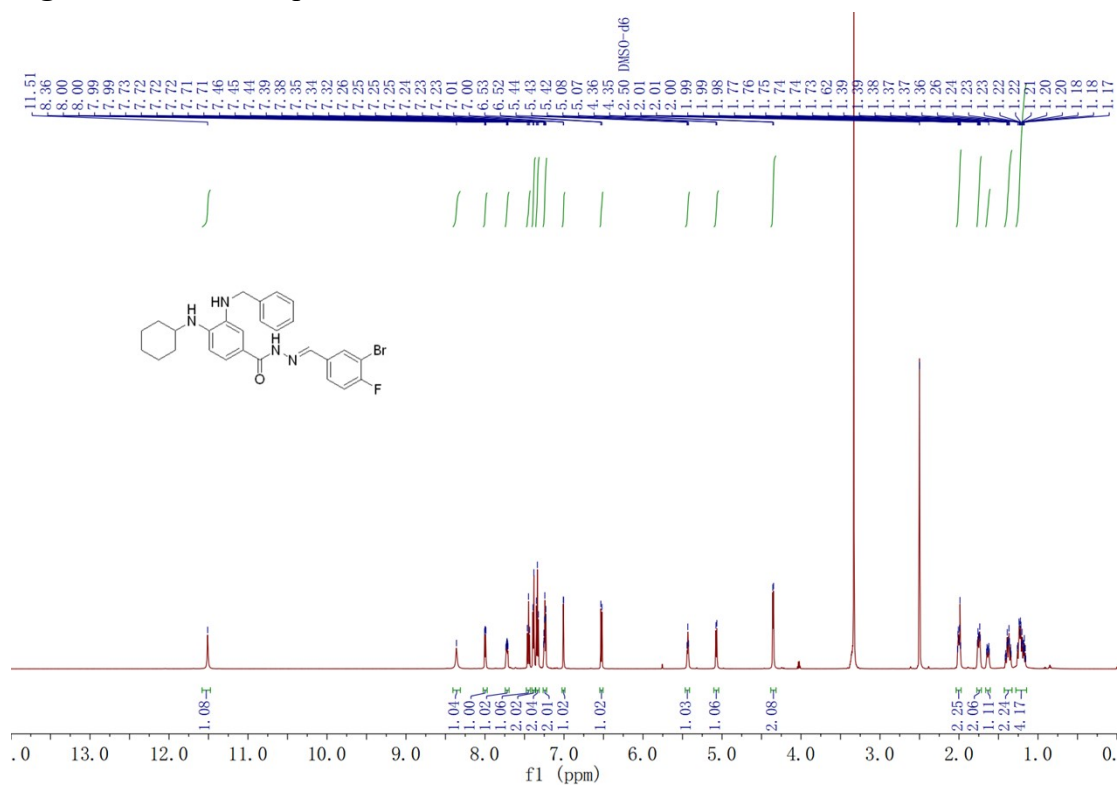

**Figure 44.**  $^{13}\text{C}$  NMR spectrum of **23**

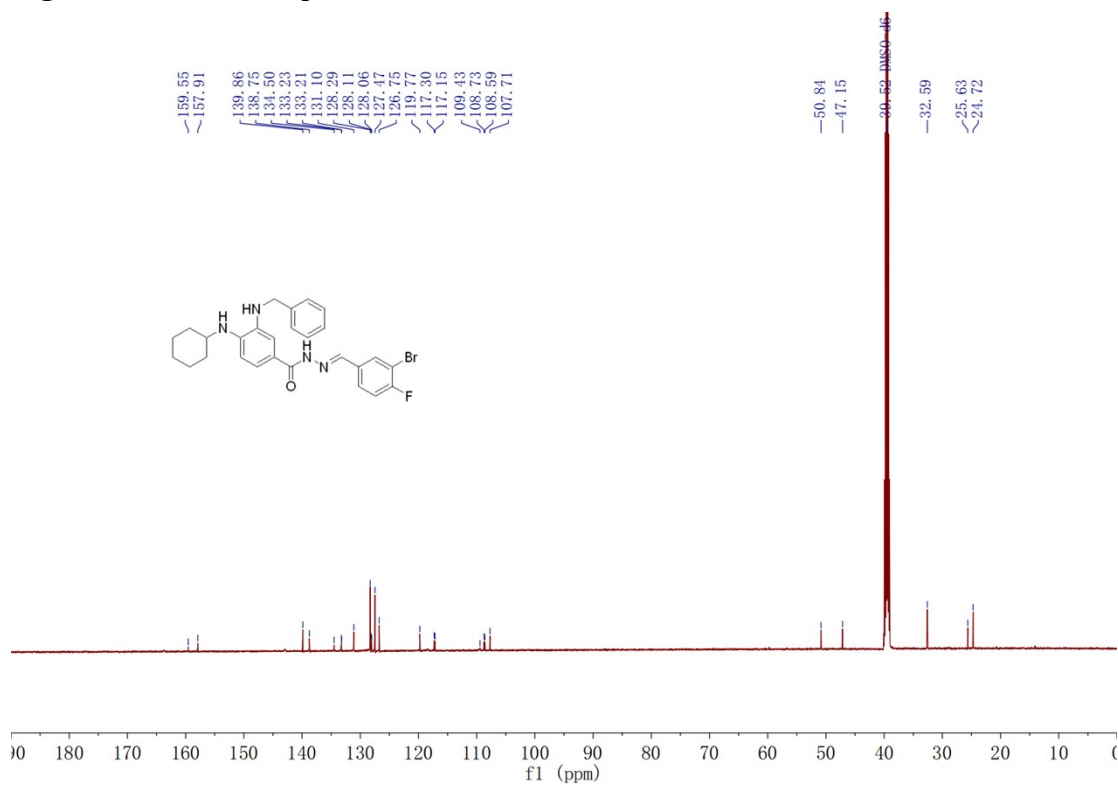

**Figure 45.**  $^1\text{H}$  NMR spectrum of **24**

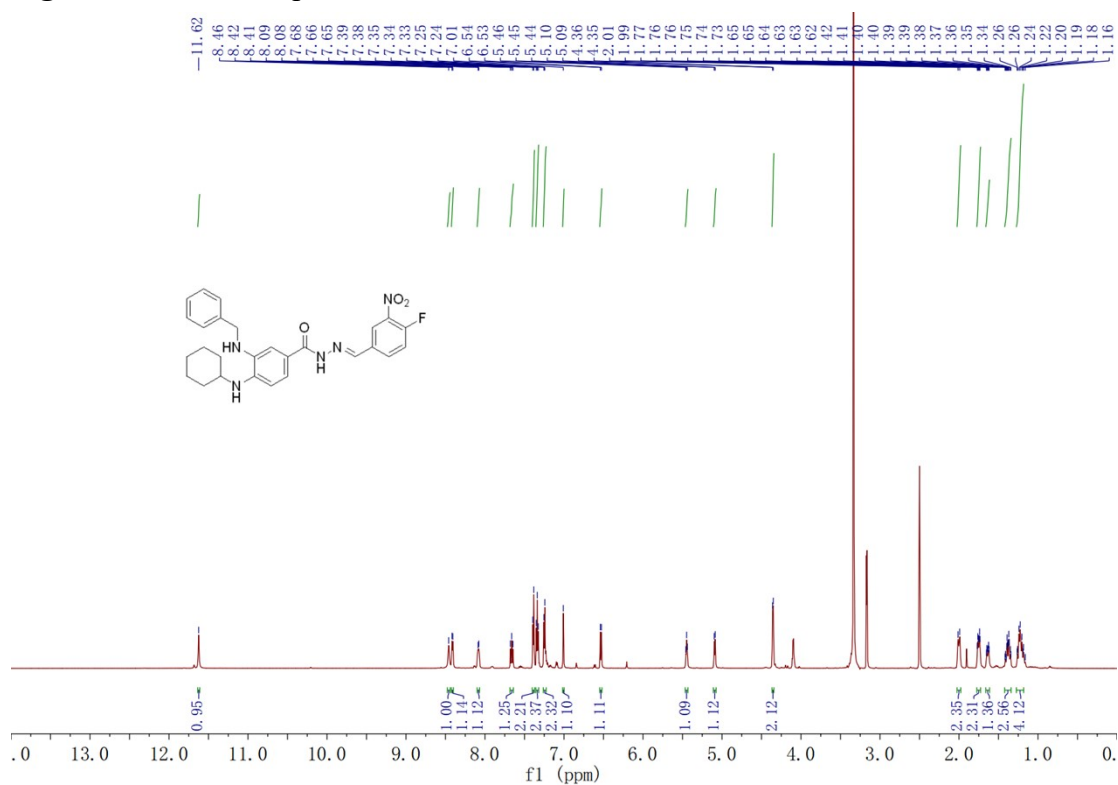

**Figure 46.**  $^{13}\text{C}$  NMR spectrum of **24**

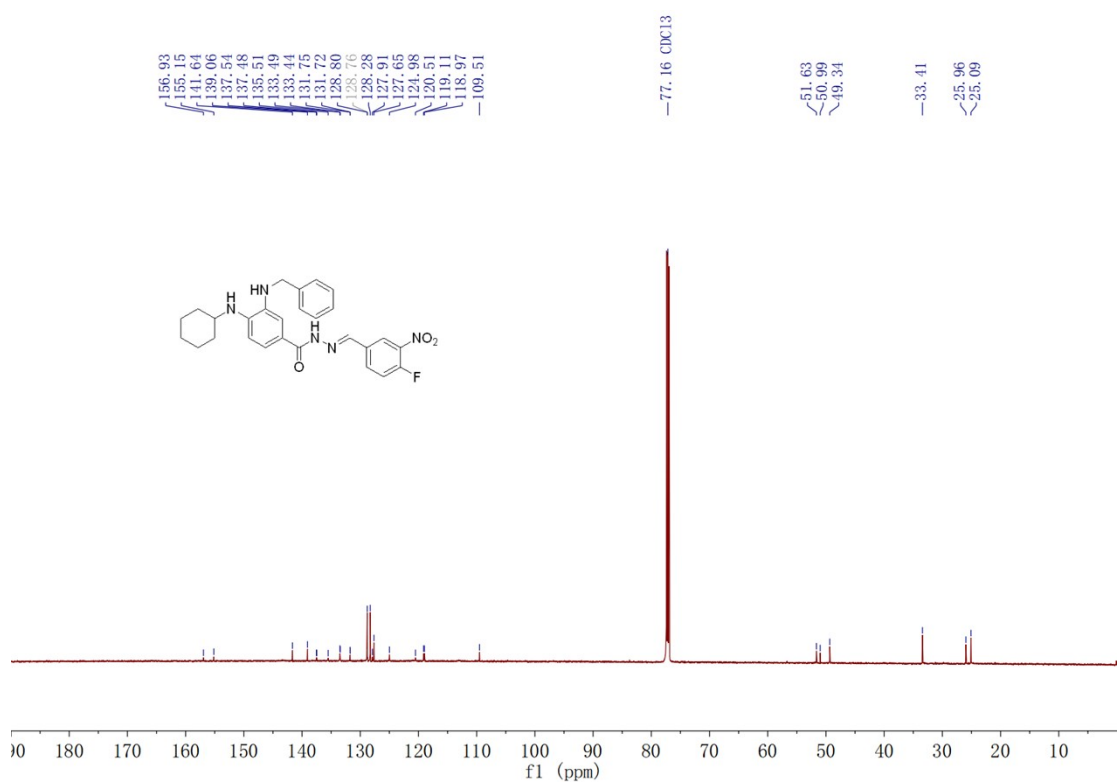

**Figure 47.**  $^1\text{H}$  NMR spectrum of **25**

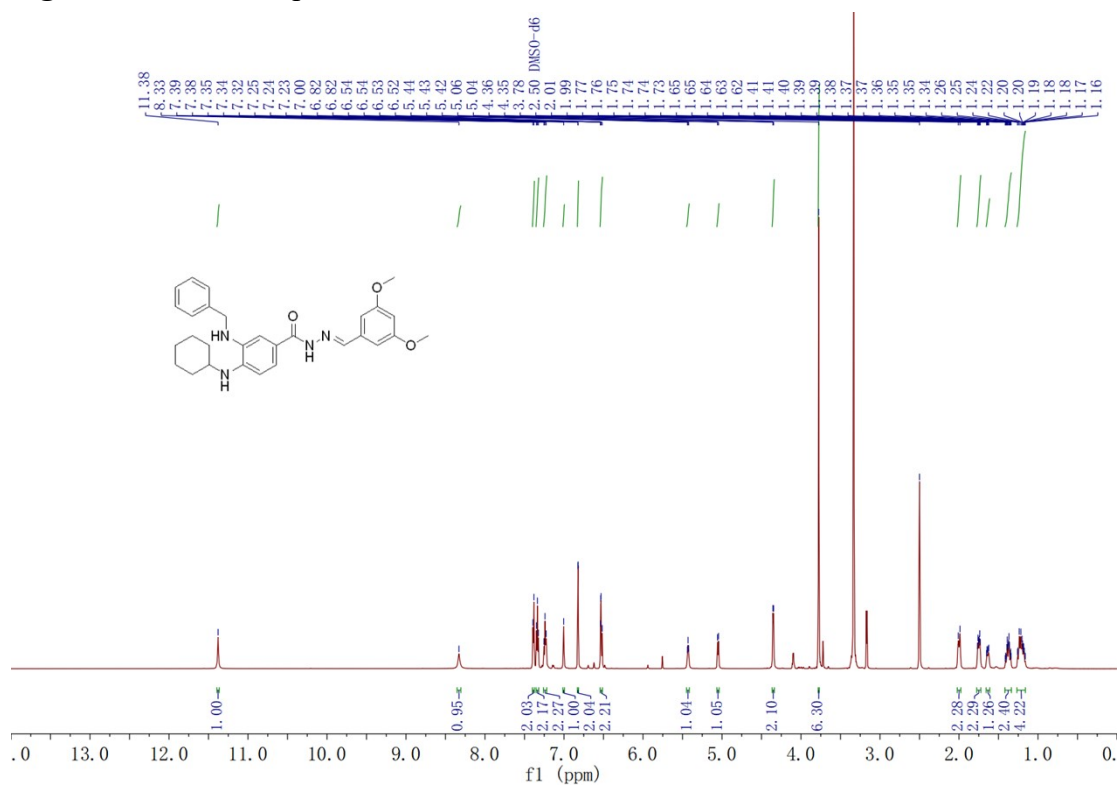

**Figure 48.**  $^{13}\text{C}$  NMR spectrum of **25**

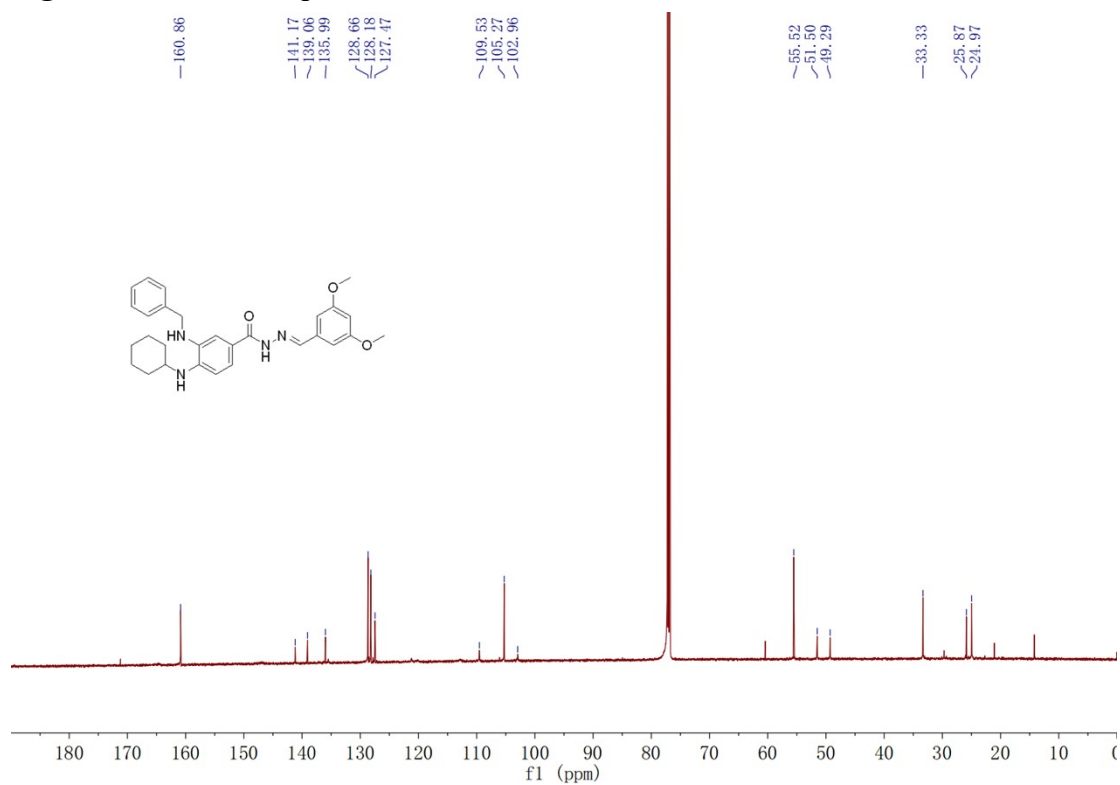

**Figure 49.**  $^1\text{H}$  NMR spectrum of **26**

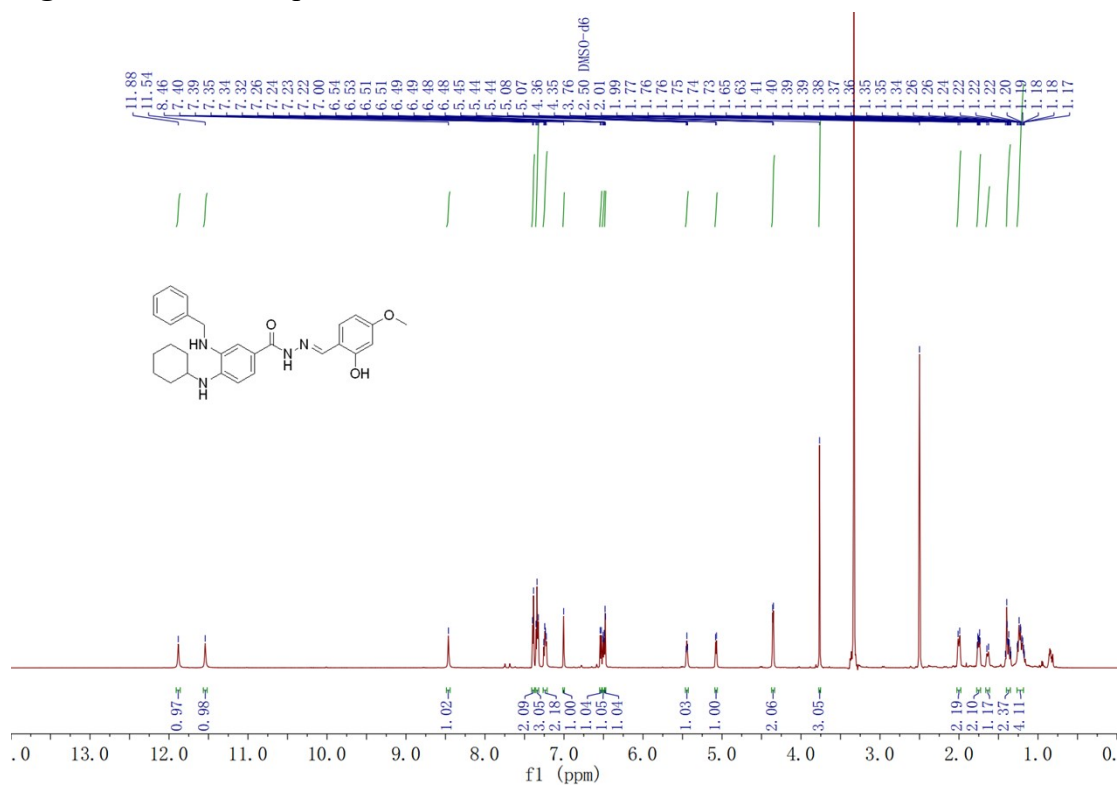

**Figure 50.**  $^{13}\text{C}$  NMR spectrum of **26**

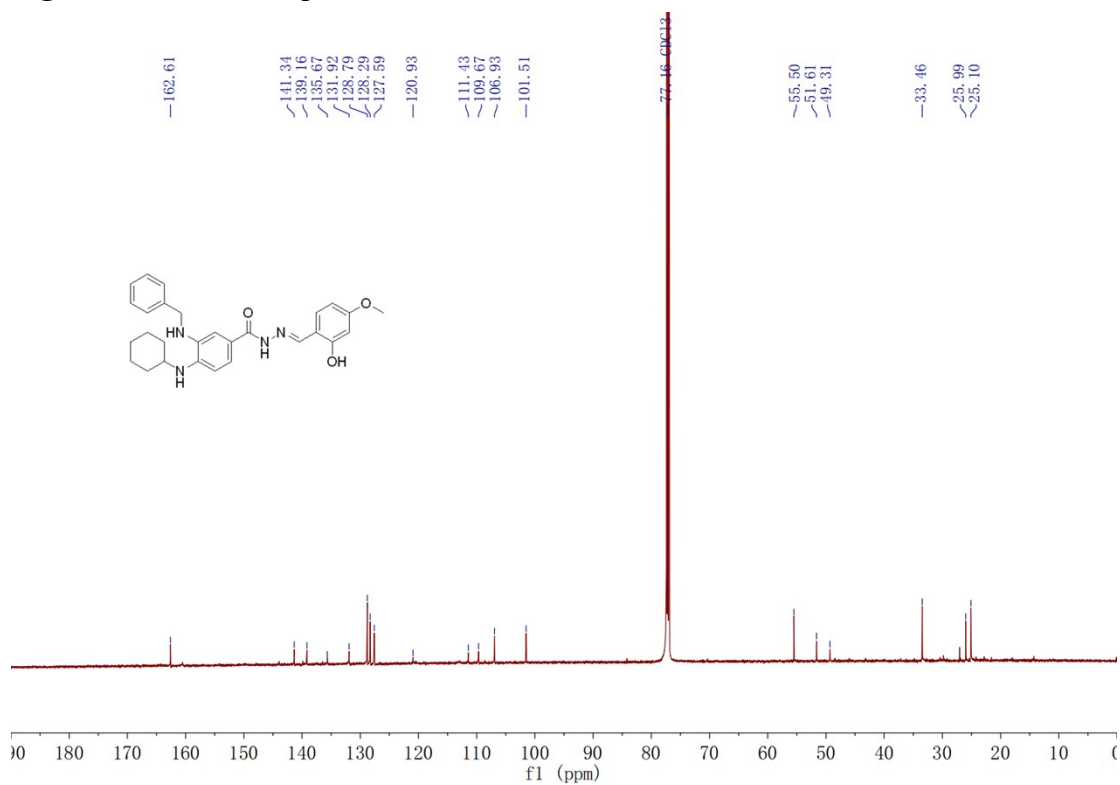

**Figure 51.** ESIMS spectrum of **7**

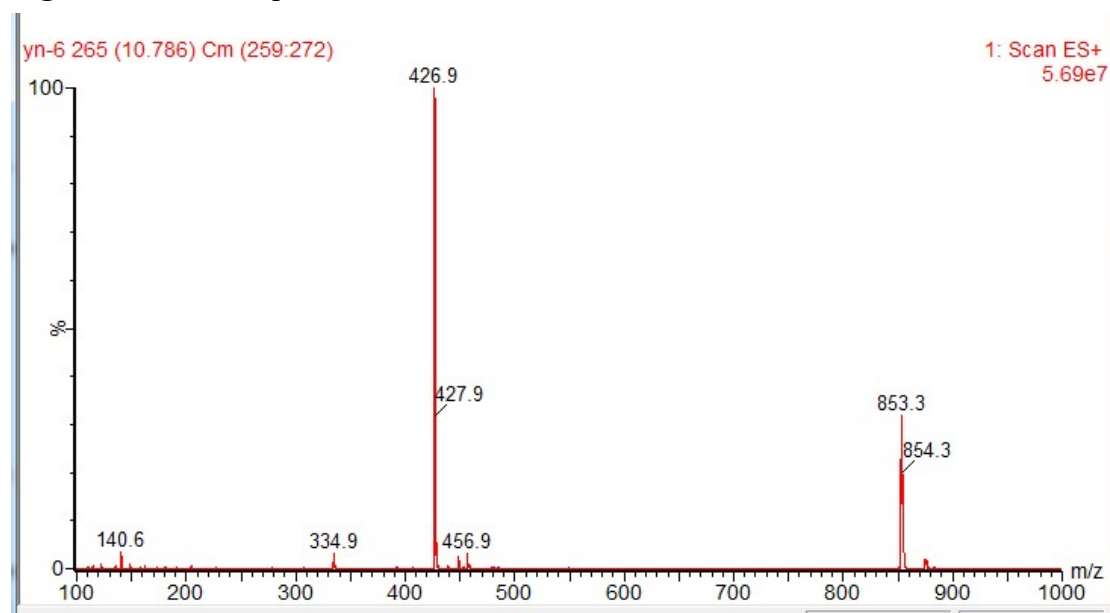

**Figure 52.** ESIMS spectrum of **8**

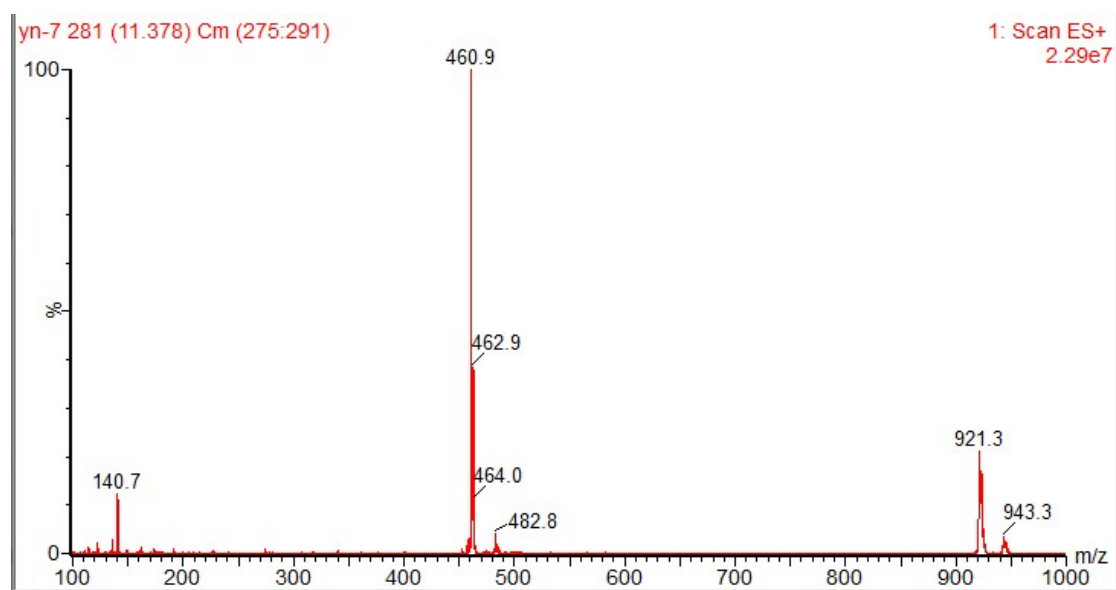

**Figure 53.** ESIMS spectrum of **9**

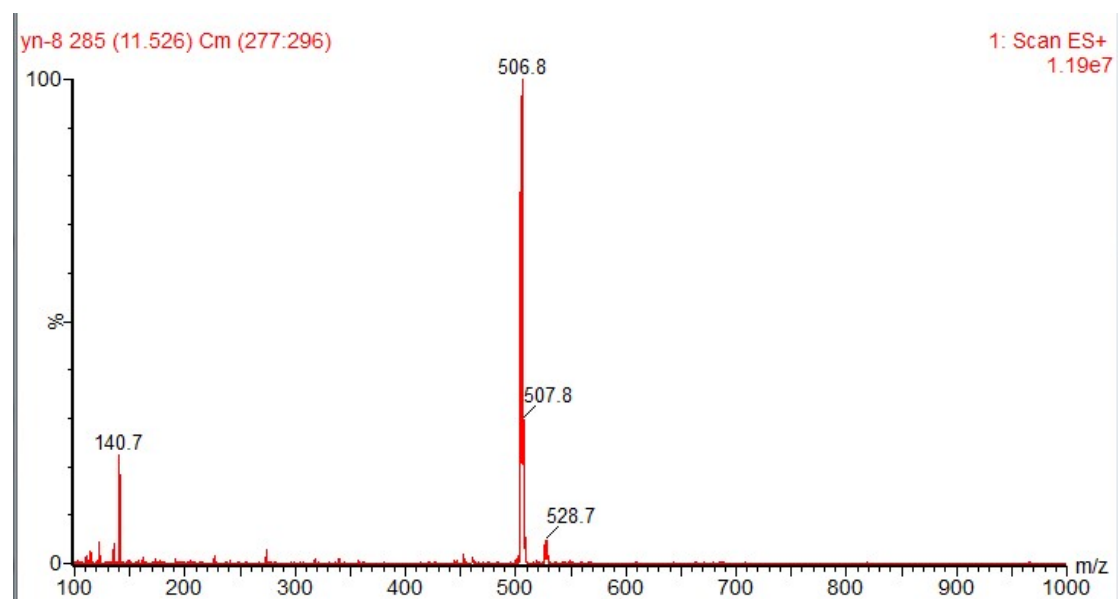

**Figure 54.** ESIMS spectrum of **10**

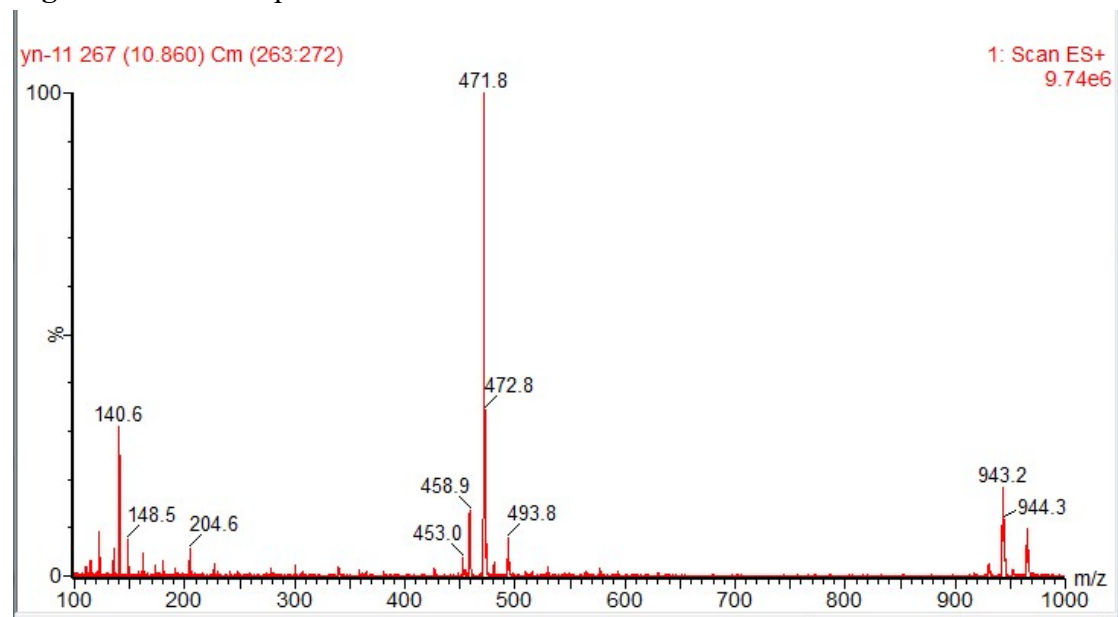

**Figure 55.** ESIMS spectrum of **11**

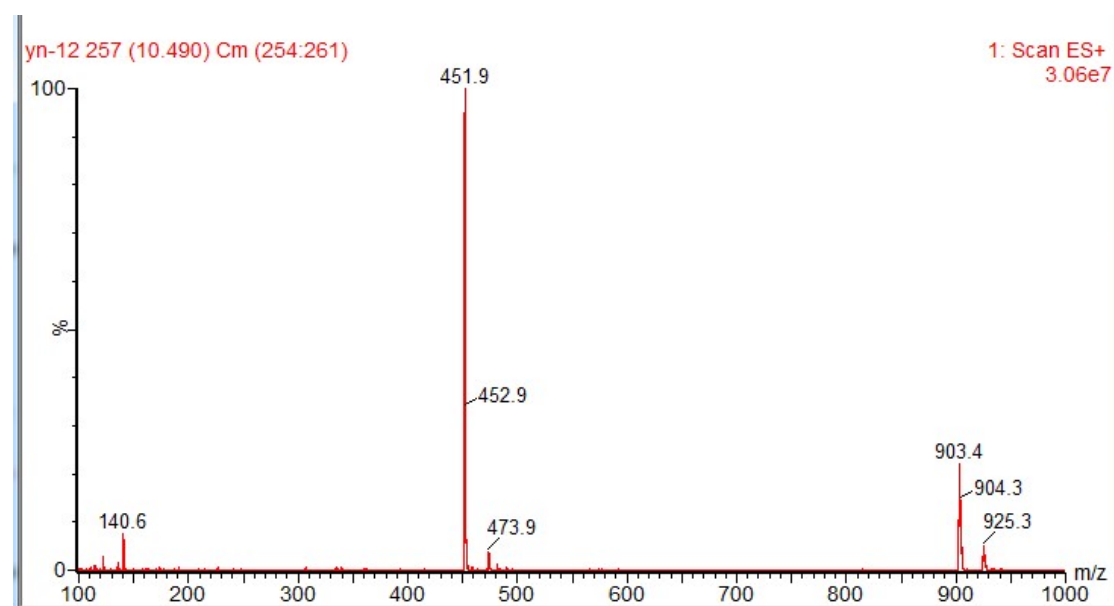

**Figure 56.** ESIMS spectrum of **12**

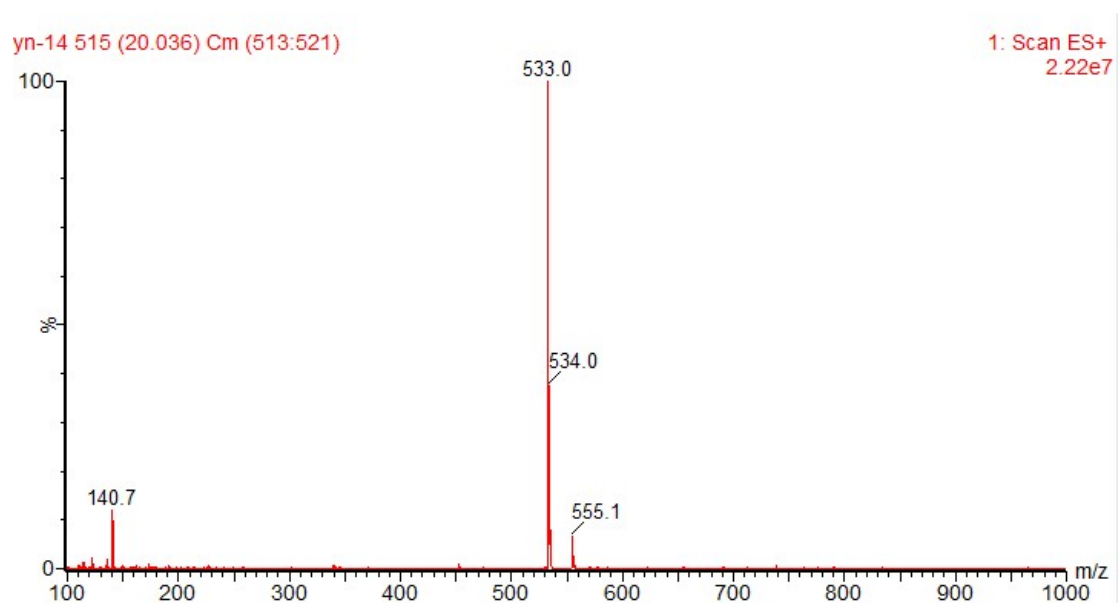

**Figure 57.** ESIMS spectrum of **13**

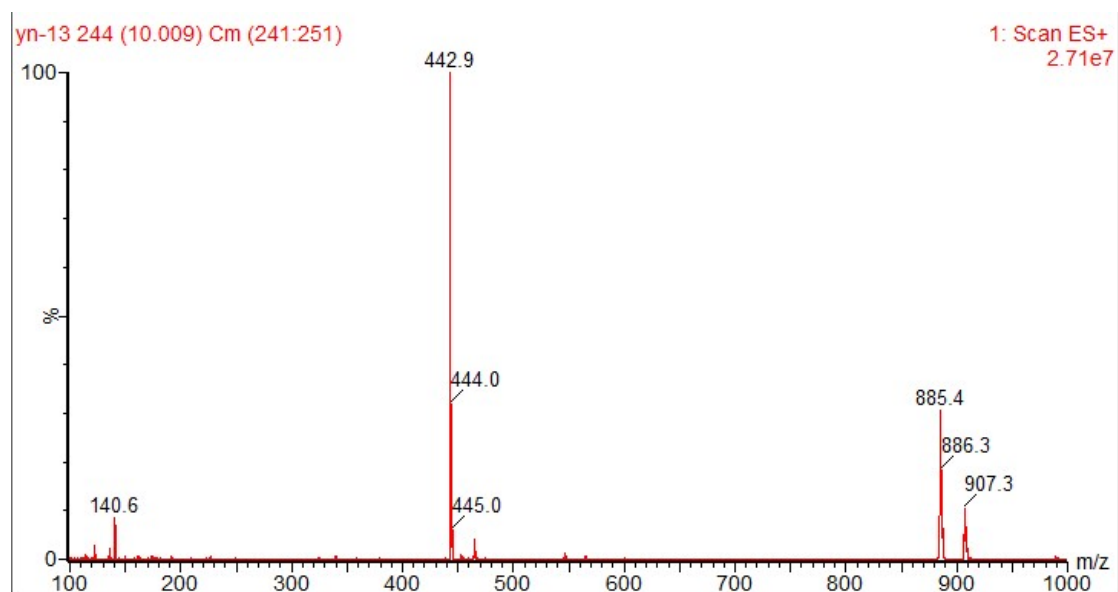

**Figure 58.** ESIMS spectrum of **14**

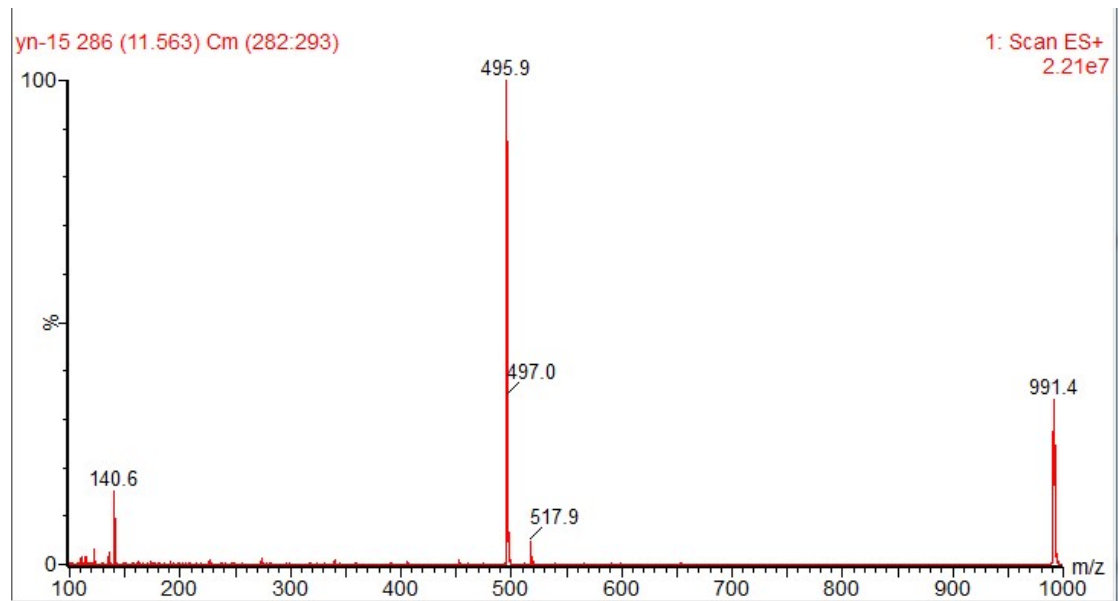

**Figure 59.** ESIMS spectrum of **15**

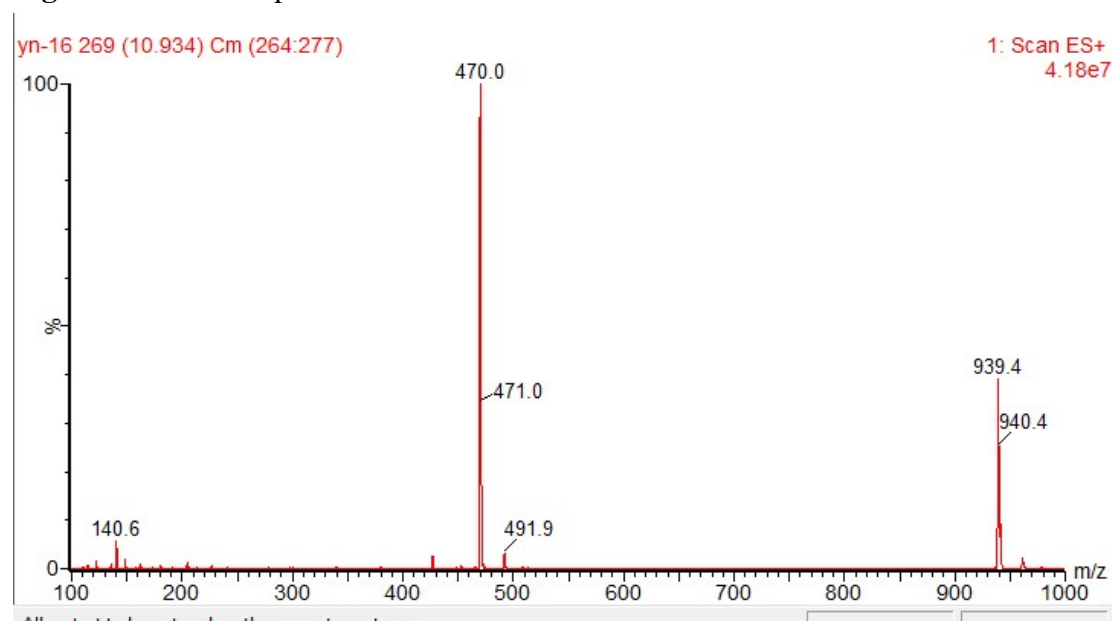

**Figure 60.** ESIMS spectrum of **16**

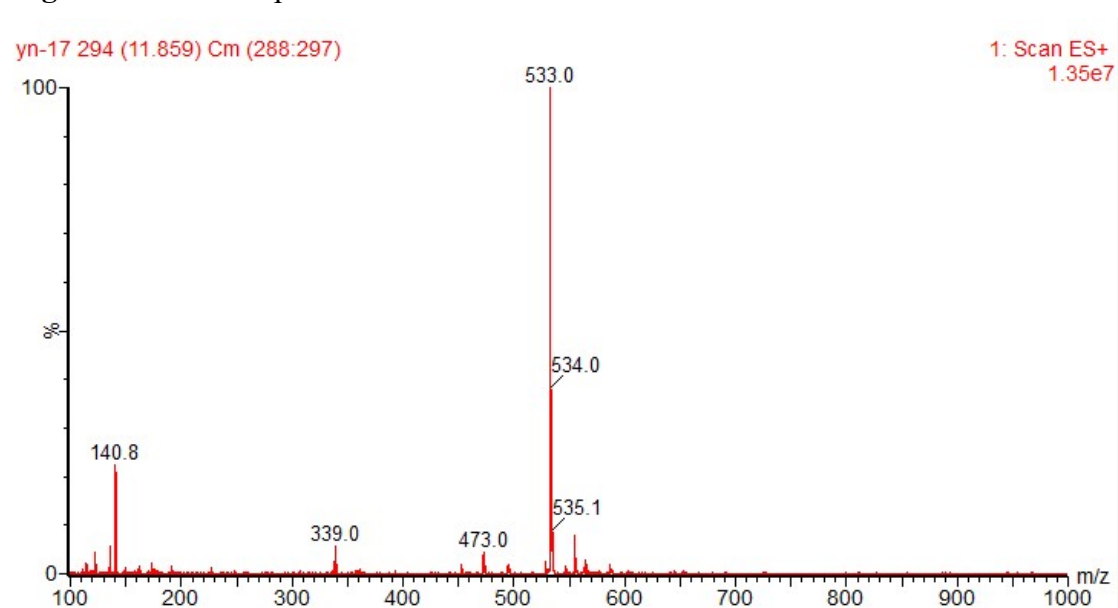

**Figure 61.** ESIMS spectrum of **17**

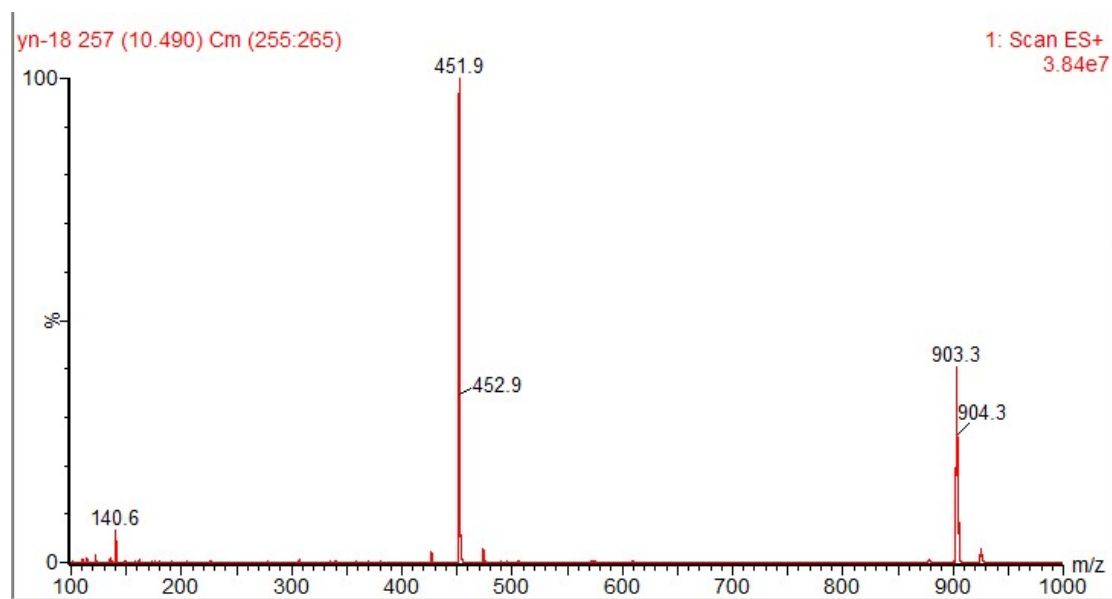

**Figure 62.** ESIMS spectrum of **18**

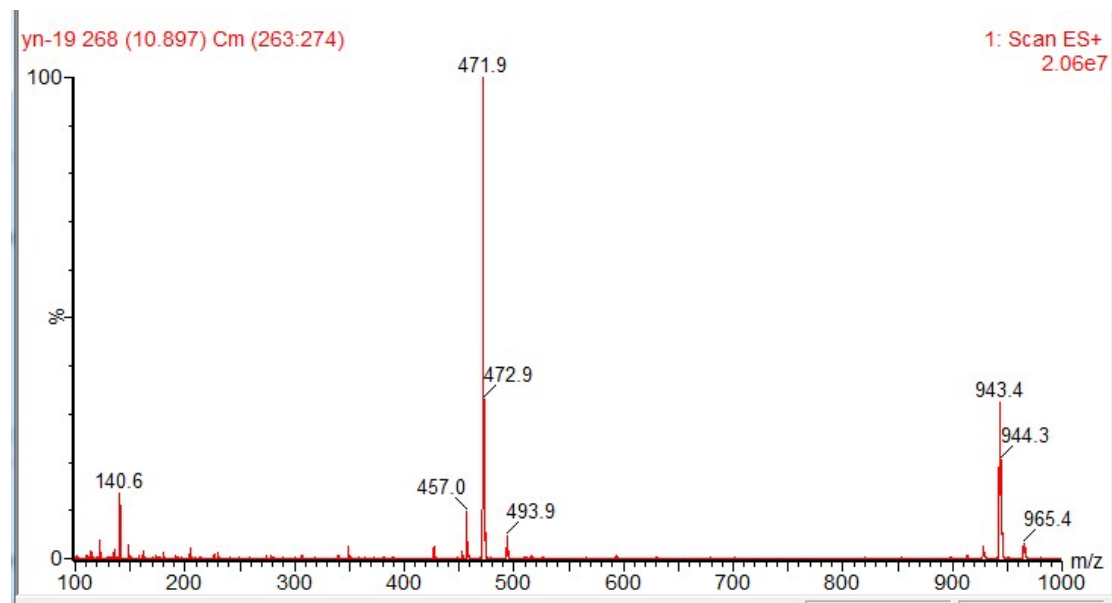

**Figure 63.** ESIMS spectrum of **19**

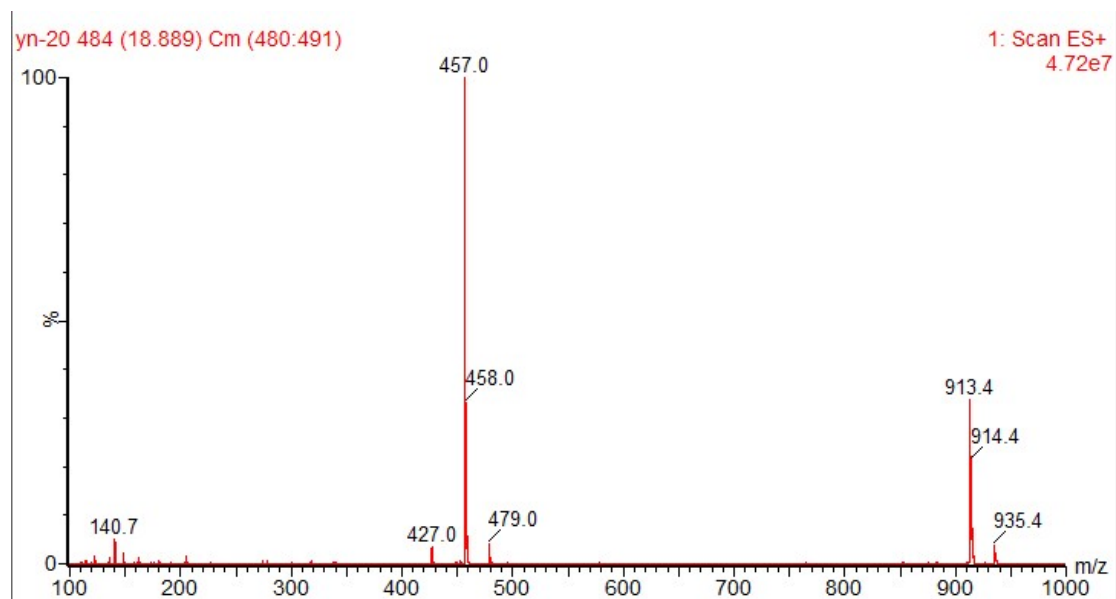

**Figure 64.** ESIMS spectrum of **20**

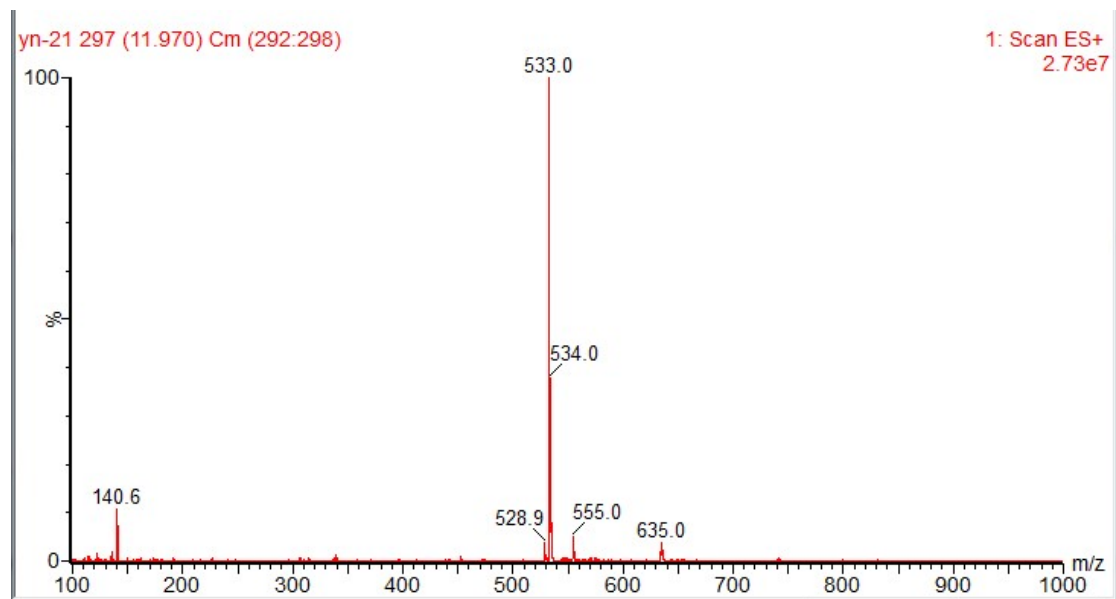

**Figure 65.** ESIMS spectrum of **21**

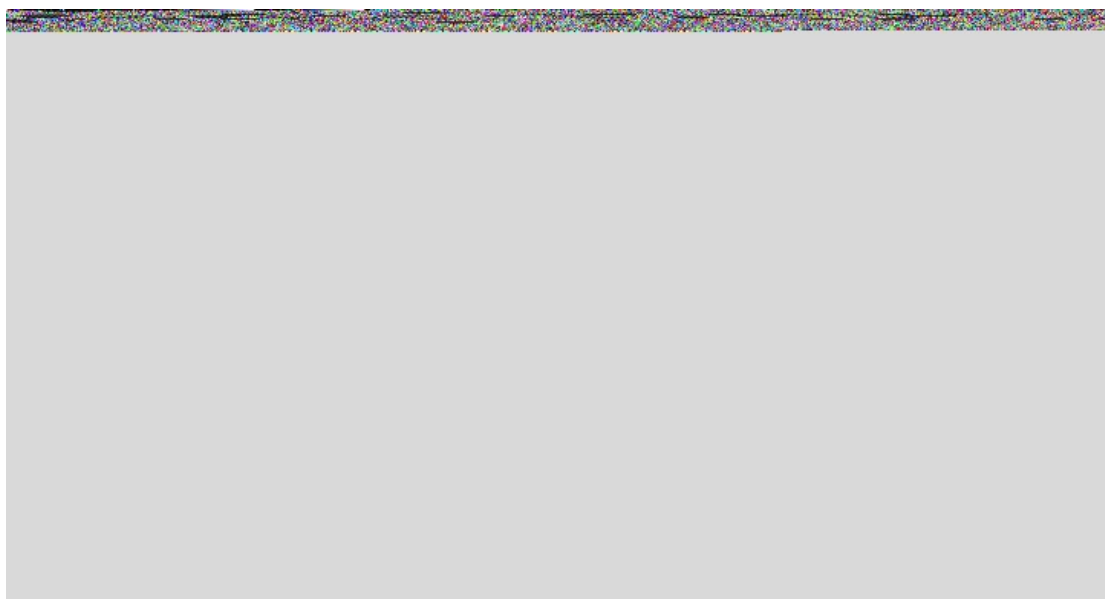

**Figure 66.** ESIMS spectrum of **22**

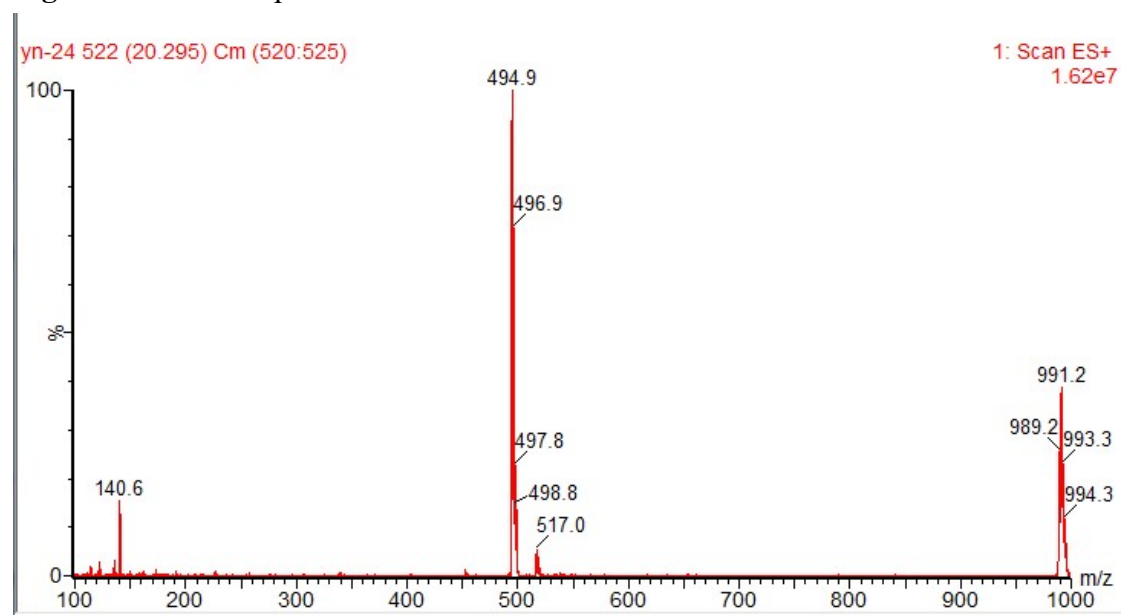

**Figure 67.** ESIMS spectrum of **23**

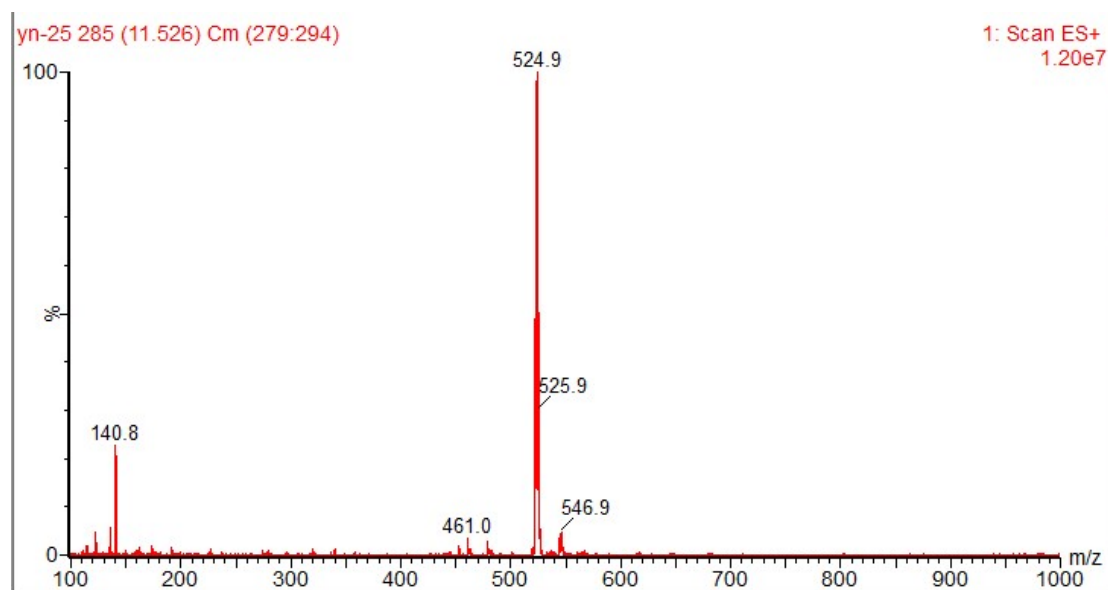

**Figure 68.** ESIMS spectrum of **24**

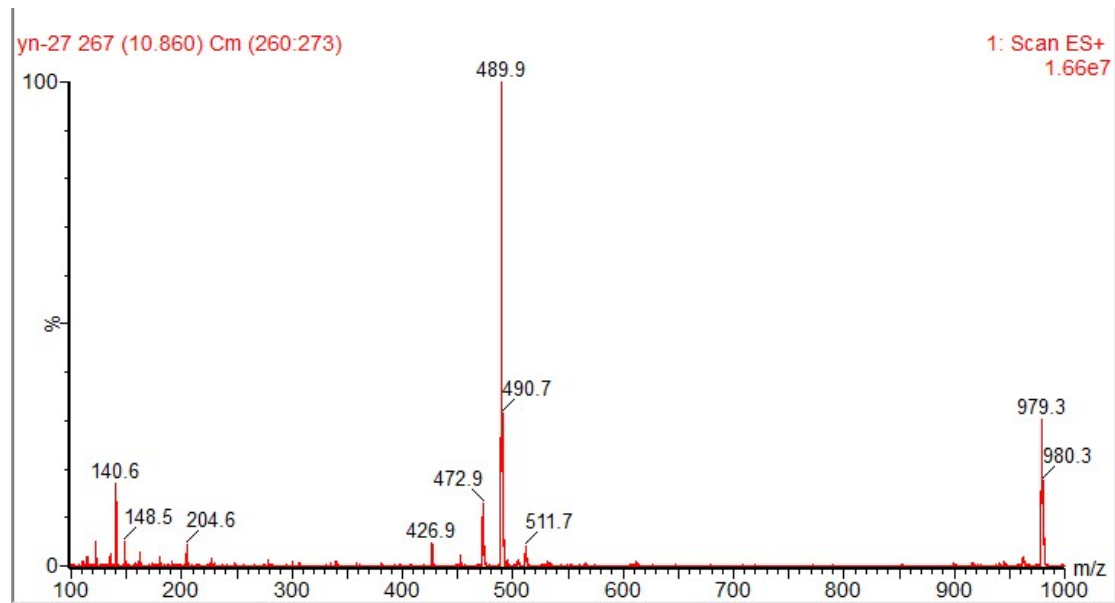

**Figure 69.** ESIMS spectrum of **25**

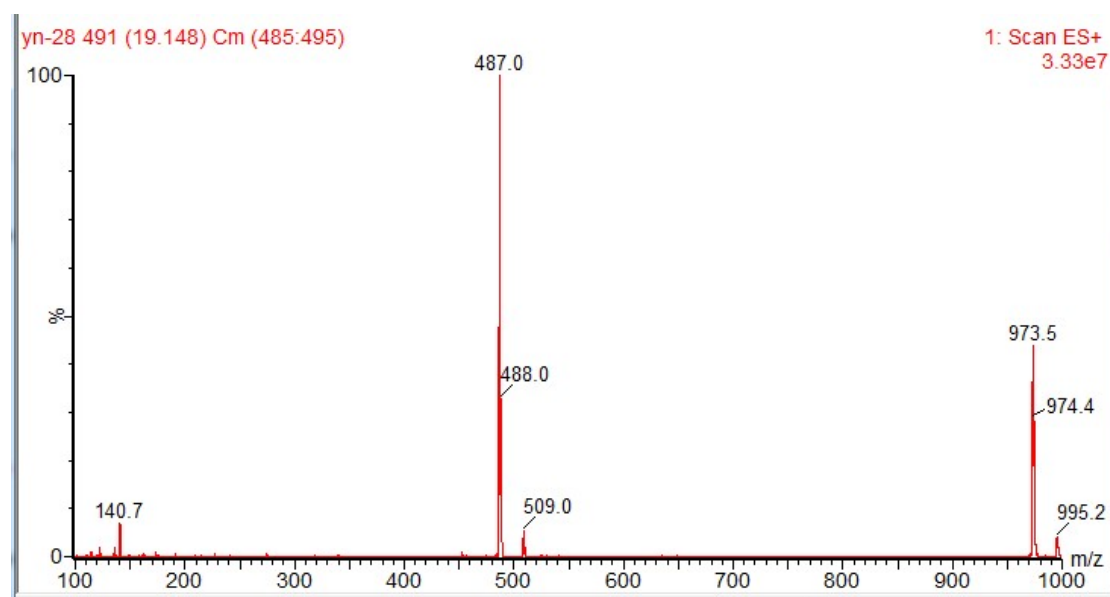

**Figure 70.** ESIMS spectrum of **26**

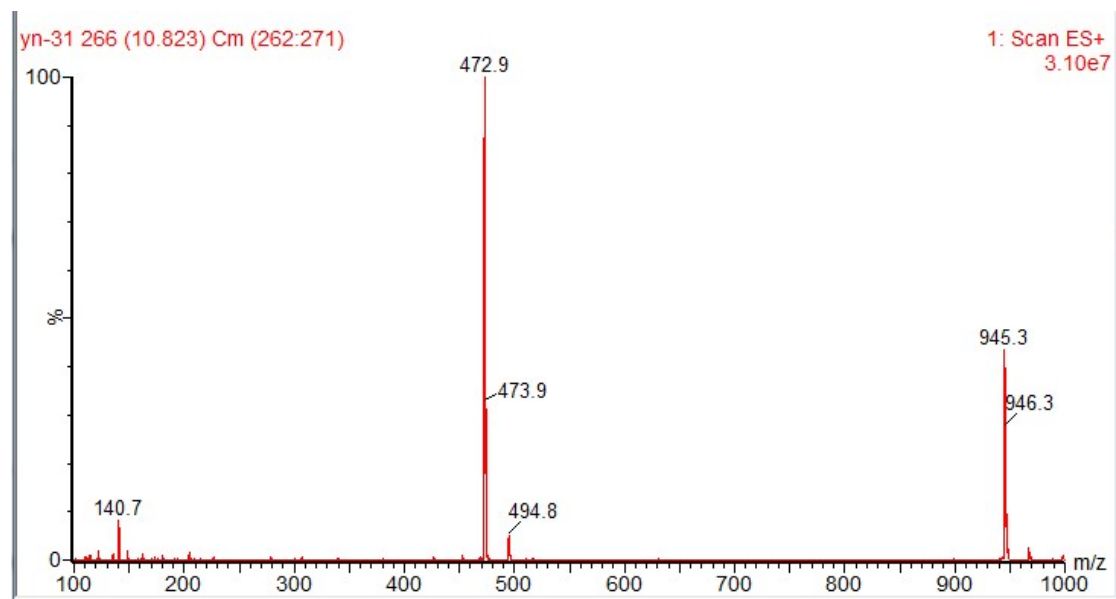

Supplement: d4md00038b1.pdf [file d4md00038b1.pdf]
